# Supplementary material for: Synthesis and environment-dependent fluorescence behavior of a biaryl-conjugated (diphenylmethylene)imidazolinone
Source: Royal Society of Chemistry journal article supplement (doi:10.1039/c9ob01727e), 2019-01-01
Supplement: c9ob01727e1.pdf [file c9ob01727e1.pdf]

Electronic Supplementary Information (ESI)

## **Synthesis and environment-dependent fluorescence behavior of a biaryl-conjugated (diphenylmethylene)imidazolinone**

Masahiro Ikejiri, Ryouta Nishiguchi, Chikoto Kubota, Aki Fujisaka, Kazuyuki Miyashita\*

Faculty of Pharmacy, Osaka Ohtani University, Nishikiori-Kita 3-11-1, Tondabayashi, Osaka  
584-8540, Japan

E-mail: miyasik@osaka-ohtani.ac.jp

|                                                                                         |     |
|-----------------------------------------------------------------------------------------|-----|
| 1. Experimental section · · · · ·                                                       | S2  |
| 1.1. Theoretical calculations                                                           |     |
| 1.2. Evaluation of optical properties                                                   |     |
| 2. <sup>1</sup> H and <sup>13</sup> C NMR spectra of new compounds · · · · ·            | S3  |
| 3. Mol2 files, energies, and number of imaginary frequencies for computed structure · · | S14 |

## 1. Experimental section

### 1.1. Theoretical calculations

The theoretical calculations were performed using Spartan'18 ver. 12.0 for Windows (Wavefunction, Inc., Irvine) under the default settings in the gas phase. The structures of DAINs **1a–h** and **2-H** were constructed and optimized through the following two steps: 1) systematic conformational search at the molecular mechanics (MMFF), 2) geometry optimization of the lowest energy conformer obtained in step 1 at the DFT/CAM-B3LYP/6-31G\* level. Frequencies were confirmed at this stage. Molecular orbitals were calculated at the DFT/CAM-B3LYP/6-31+G\* level for the optimized structure obtained in step 2.

### 1.2. Evaluation of optical properties

Absorption spectra were measured at a concentration of  $1.0 \times 10^{-5}$  M. Fluorescence spectra in tricapyrylin were measured at a concentration of  $1.0 \times 10^{-4}$  M under the irradiation of  $\lambda_{\max}$  (Table S1) for the excitation. The spectra in tricapyrylin were corrected by subtracting the background emission from tricapyrylin. Fluorescence spectra of AIE (suspension and powder) were measured under the irradiation of  $\lambda_{\text{ex}}$  that was obtained from their excitation spectra. The suspension for AIE was prepared by mixing the DAIN solution in DMSO ( $1.0 \times 10^{-2}$  M) and water (volume ratio: 1/999, final concentration:  $1.0 \times 10^{-5}$  M).

**Table S1:** Excitation wavelengths (nm) of DAINs **1** and **2-H**.

|                            | <b>1a</b> | <b>1b</b> | <b>1c</b> | <b>1d</b> | <b>1e</b> | <b>1f</b> | <b>1g</b> | <b>1h</b> | <b>2-H</b> |
|----------------------------|-----------|-----------|-----------|-----------|-----------|-----------|-----------|-----------|------------|
| $\lambda_{\max}$           | 399       | 401       | 401       | 404       | 404       | 406       | 400       | 401       | 391        |
| $\lambda_{\text{ex(sus)}}$ | 403       | 403       | 404       | 405       | 406       | 406       | —         | —         | —          |
| $\lambda_{\text{ex(pow)}}$ | 369       | 370       | 369       | 370       | 368       | 369       | 369       | 369       | —          |

Dimyristoylphosphatidylcholine (DMPC) vesicle was prepared by a common method, which involved thin film hydration and sonication.<sup>1</sup> The fluorescence spectra of the mixture of **1e** and the DMPC vesicle were measured after addition of a DMPC vesicle solution in water ( $2.0 \times 10^{-3}$  M) to a suspension of **1e** in water containing 0.125% DMSO ( $1.25 \times 10^{-5}$  M), (volume ratio: 1/4, final concentration of DMPC:  $4.0 \times 10^{-4}$  M, **1e**:  $1.0 \times 10^{-5}$  M).

#### Reference:

1) A. Akbarzadeh, R. Rezaei-Sadabady, S. Davaran, S. W. Joo, N. Zarghami, Y. Hanifehpour, M. Samiei, M. Kouhi and K. Nejati-Koshki, *Nanoscale Res. Lett.*, 2013, **8**, 102.

## 2. $^1\text{H}$ and $^{13}\text{C}$ NMR spectra of new compounds

### Compound 5

#### $^1\text{H}$ -NMR

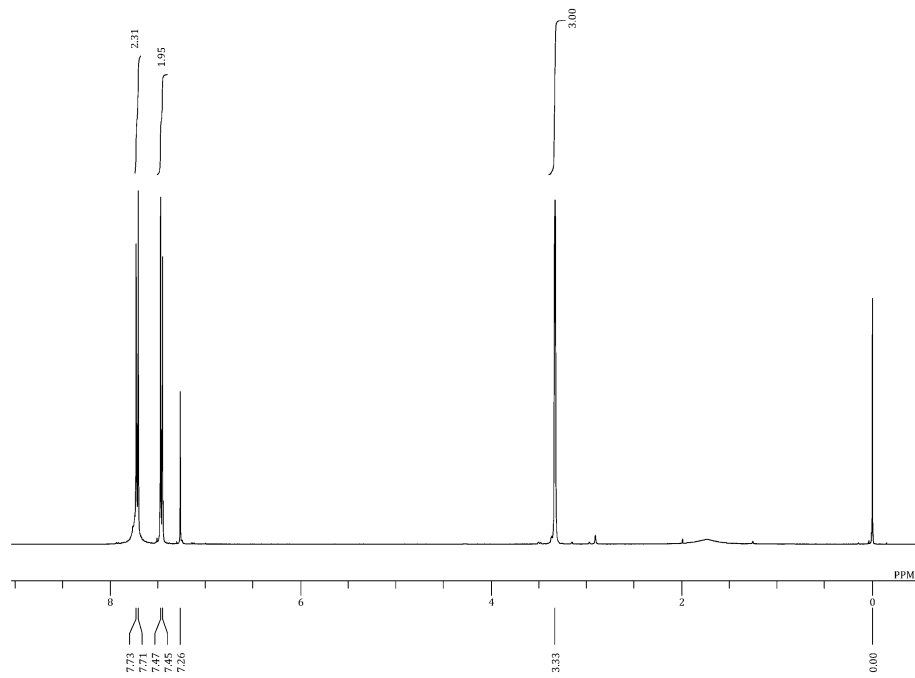

#### $^{13}\text{C}$ -NMR

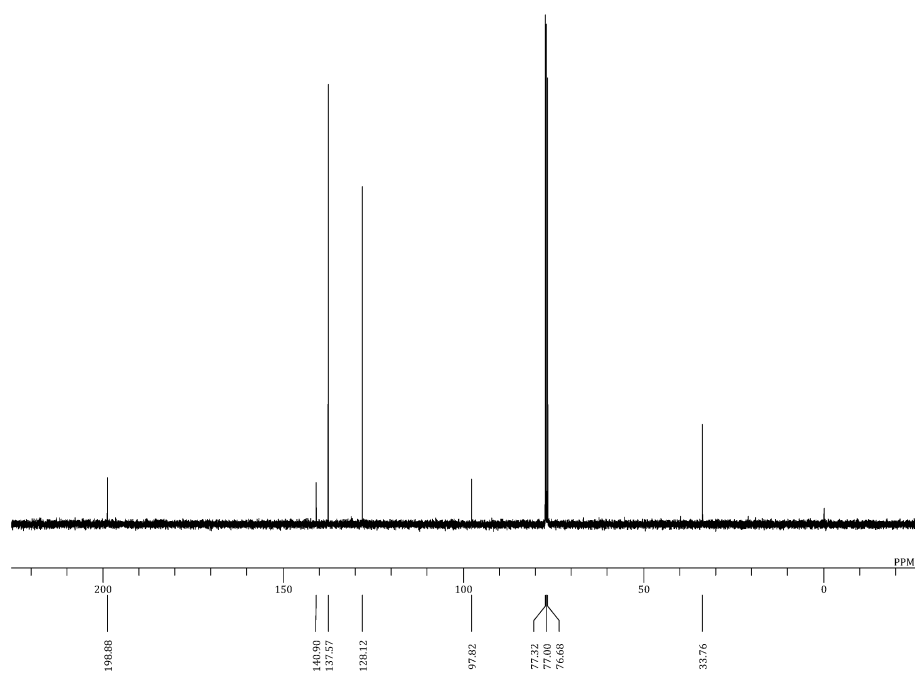

Compound 6

<sup>1</sup>H-NMR

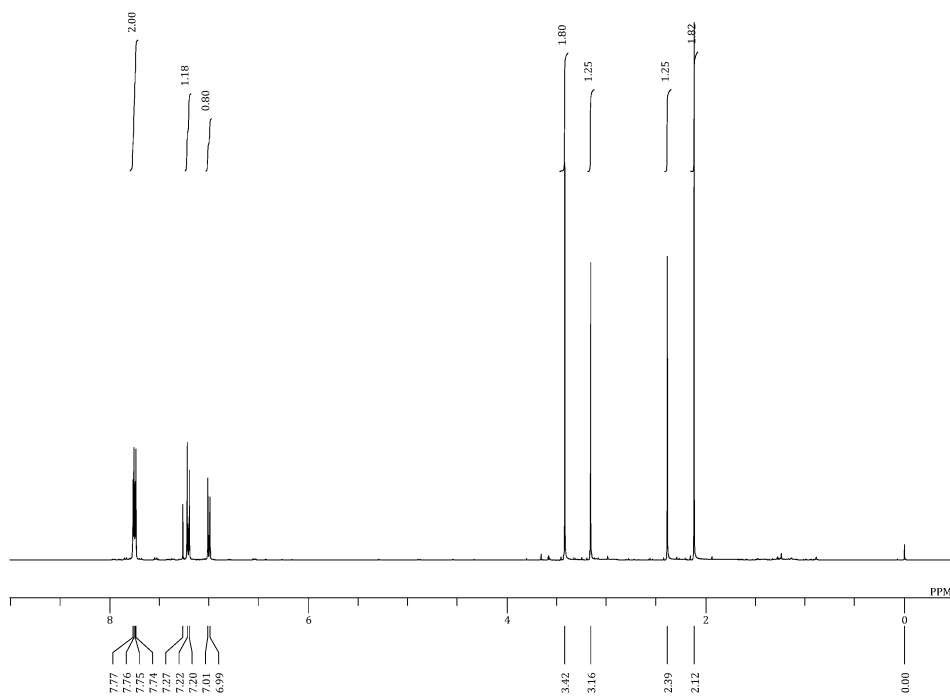

<sup>13</sup>C-NMR

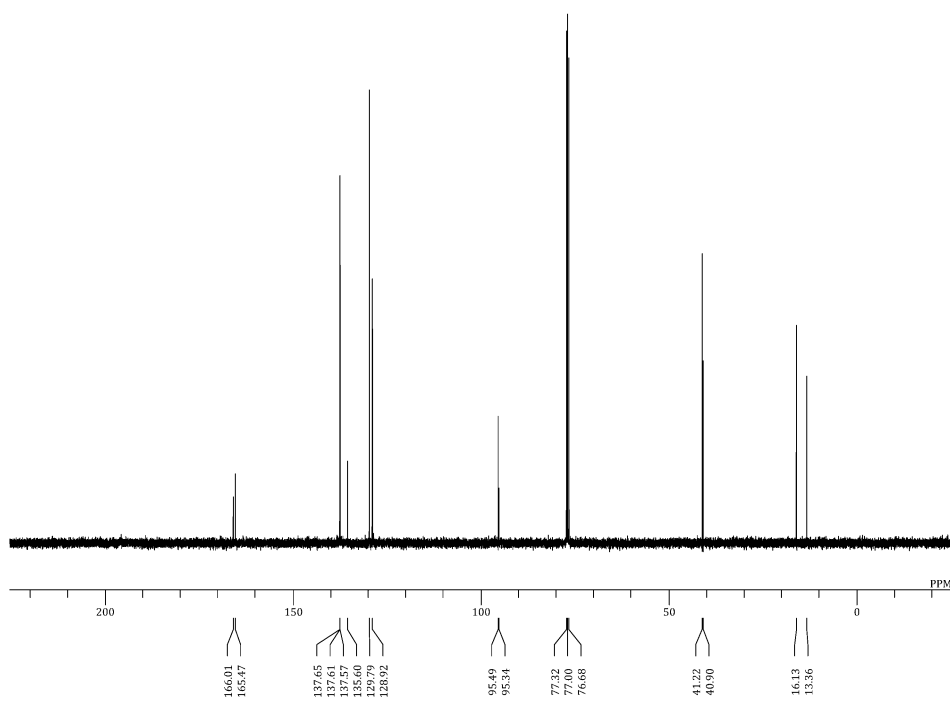

Compound **2-I**

$^1\text{H-NMR}$

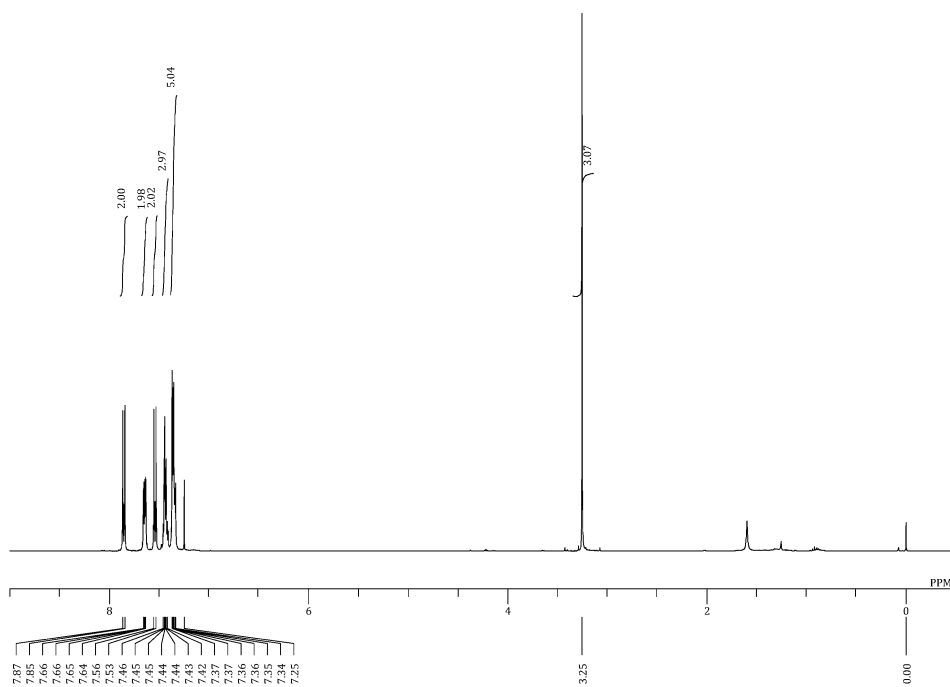

$^{13}\text{C-NMR}$

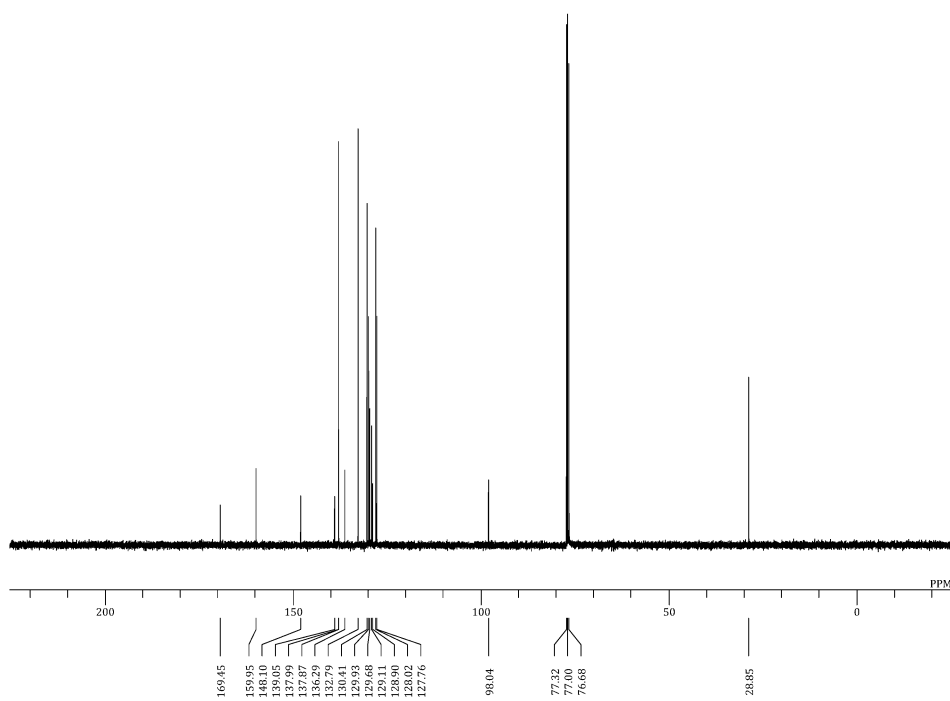

Compound **1a**

$^1\text{H-NMR}$

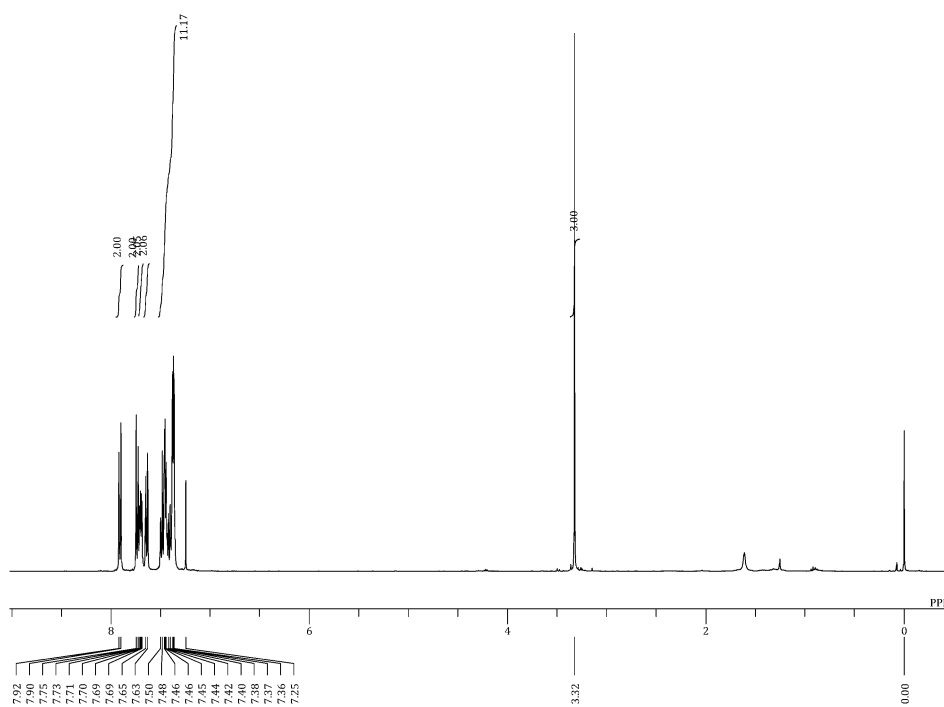

$^{13}\text{C-NMR}$

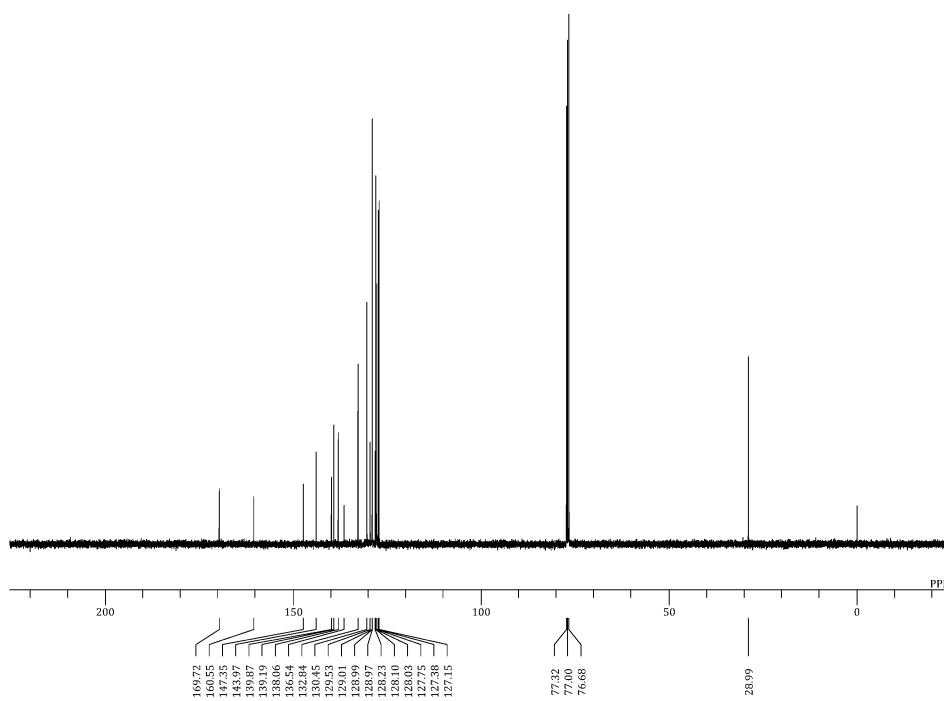

Compound **1b**

<sup>1</sup>H-NMR

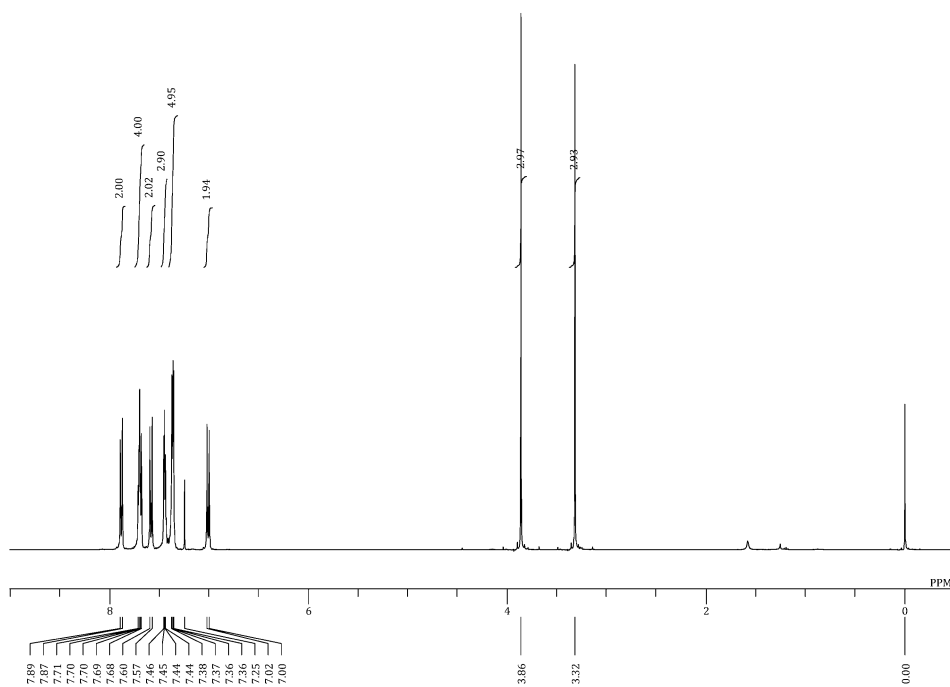

<sup>13</sup>C-NMR

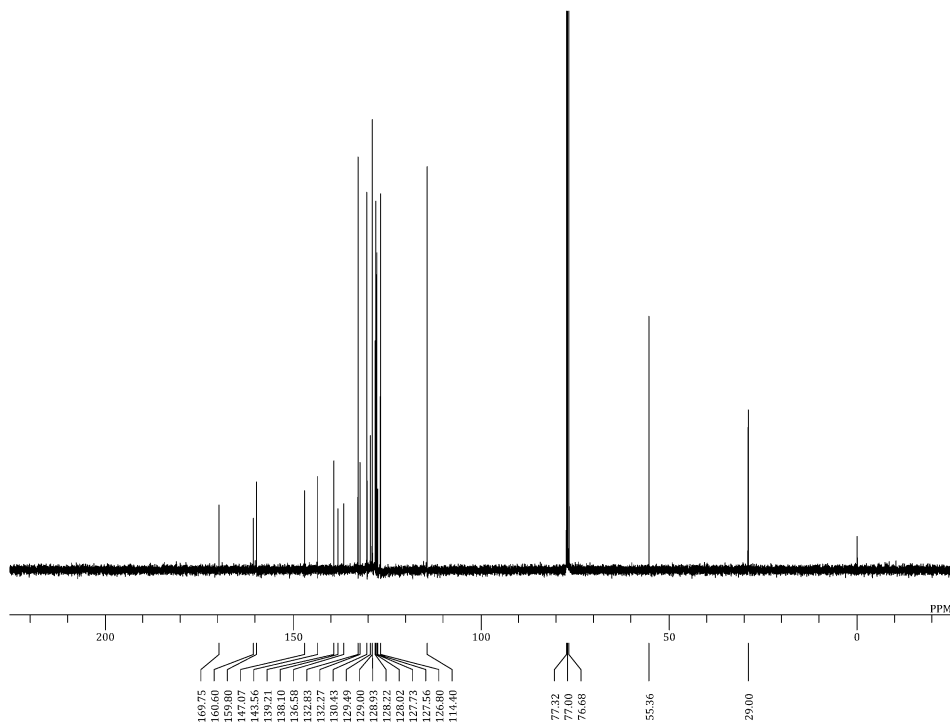

Compound **1c**

$^1\text{H-NMR}$

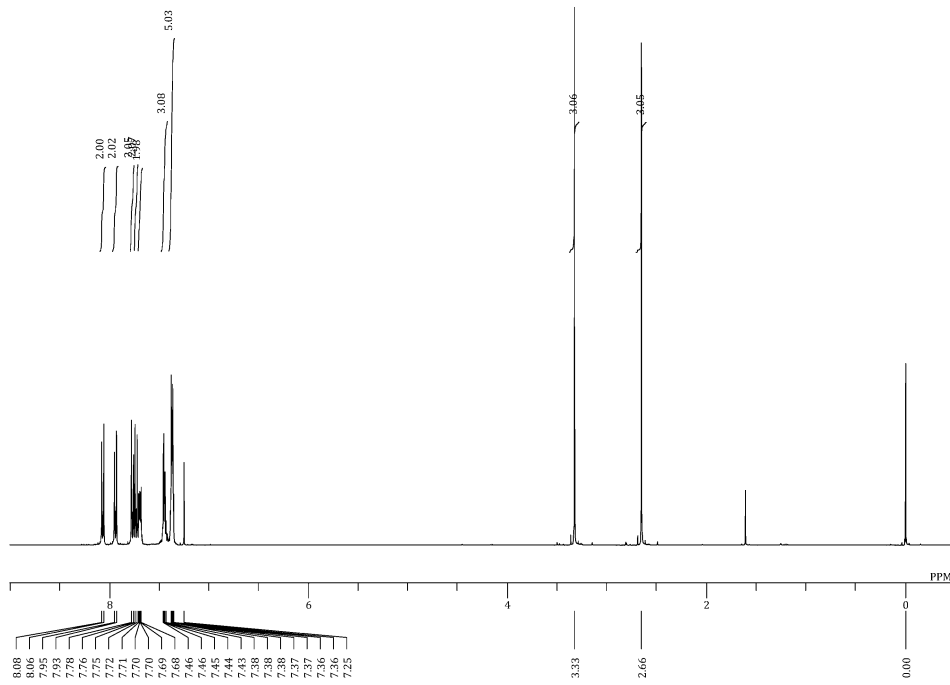

$^{13}\text{C-NMR}$

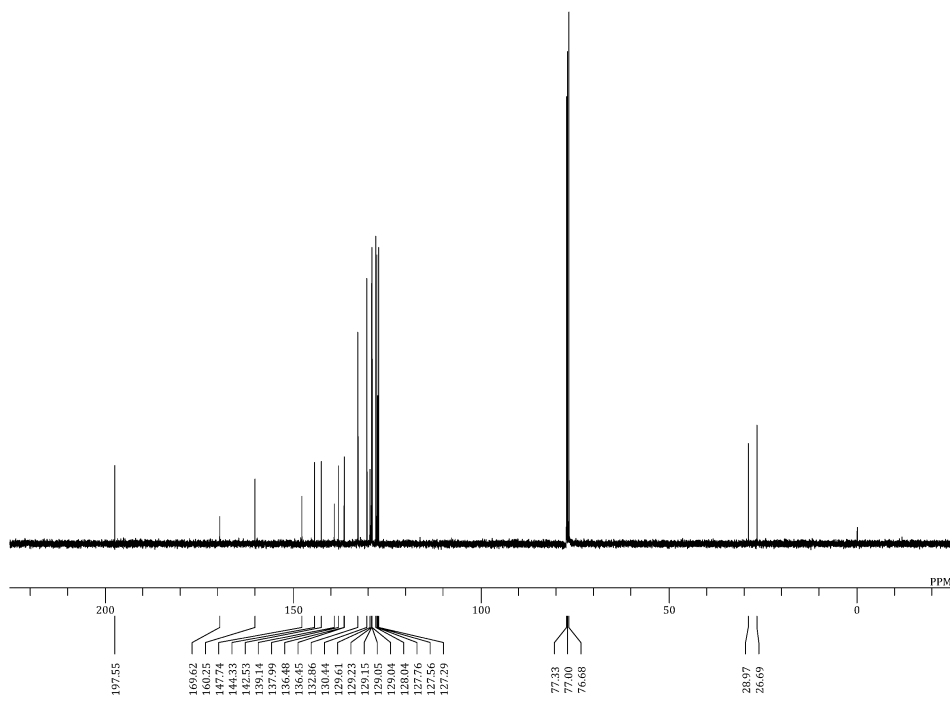



Compound **1d**

<sup>1</sup>H-NMR

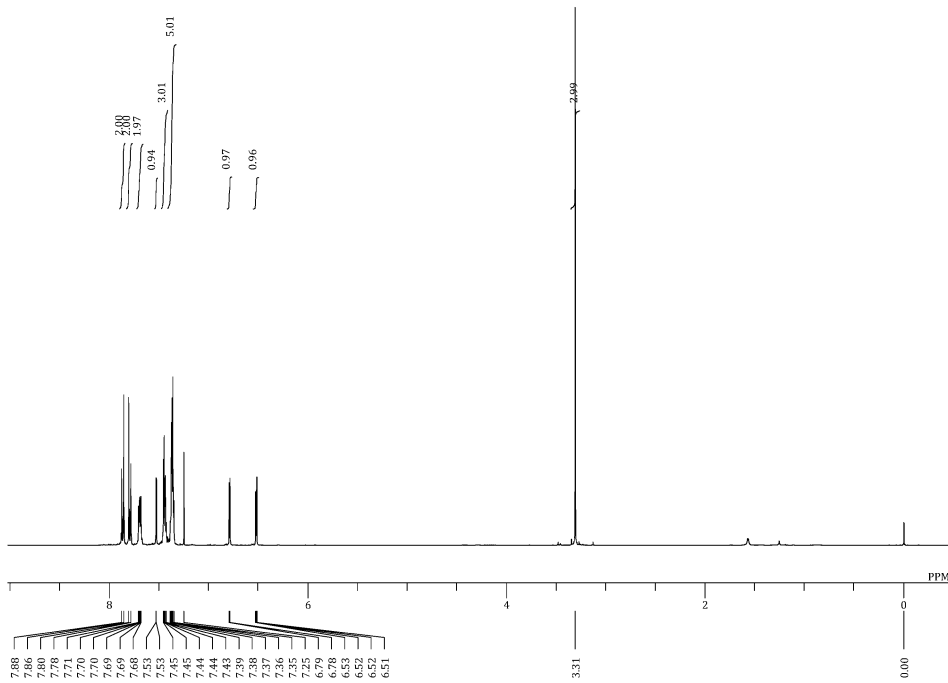

<sup>13</sup>C-NMR

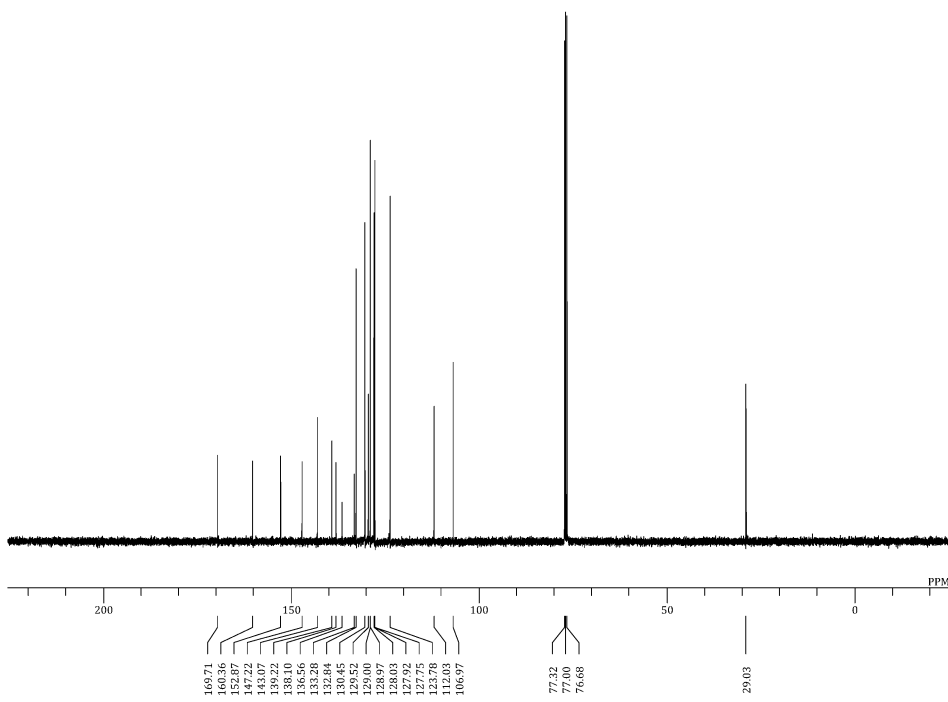

Compound **1e**

$^1\text{H-NMR}$

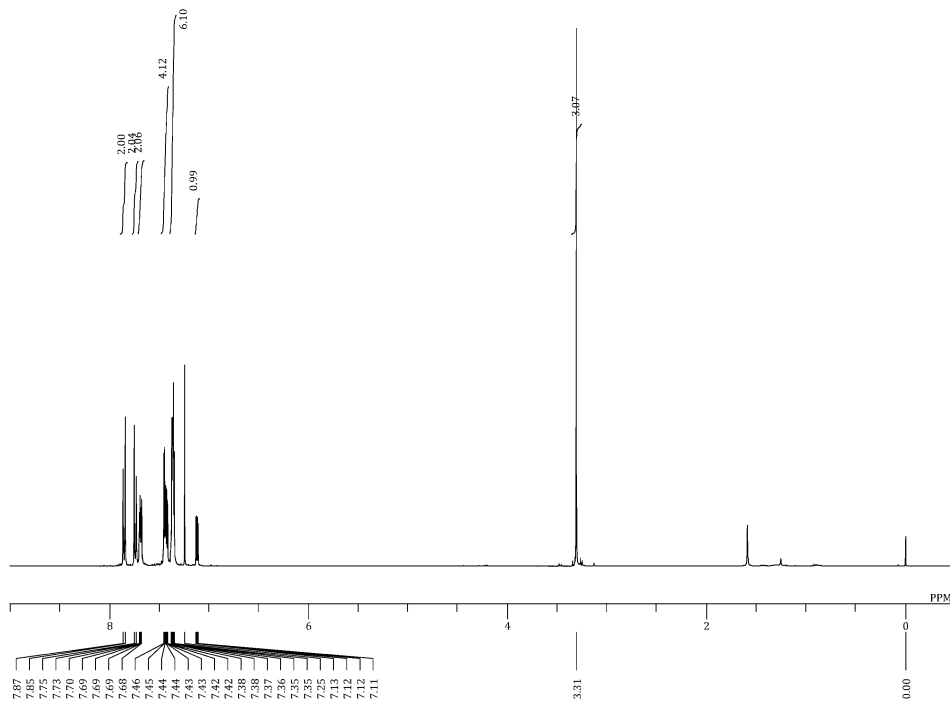

$^{13}\text{C-NMR}$

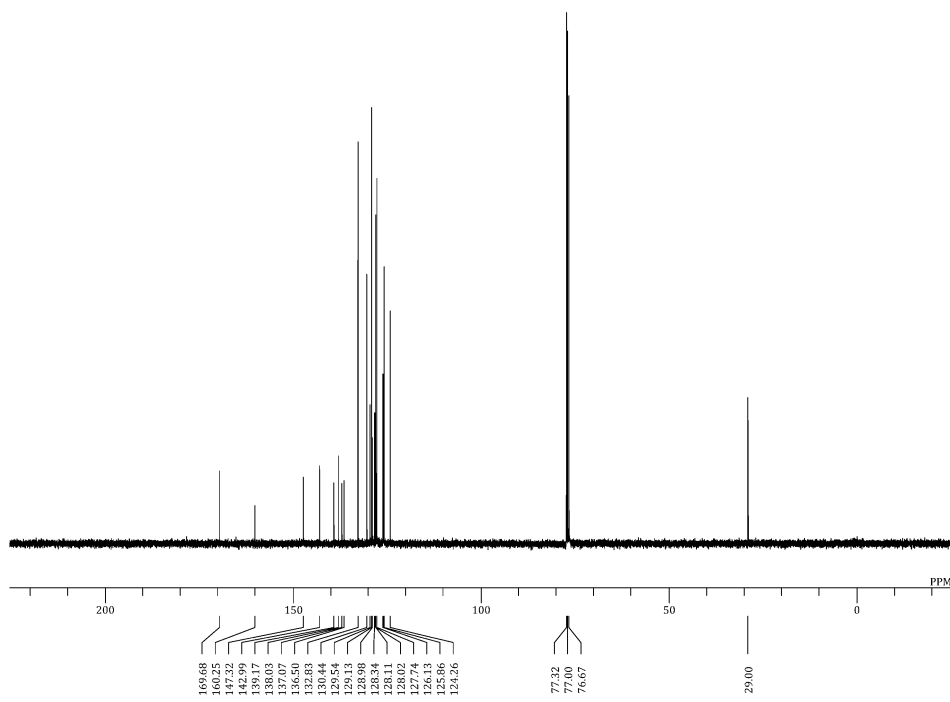

Compound **1f**

<sup>1</sup>H-NMR

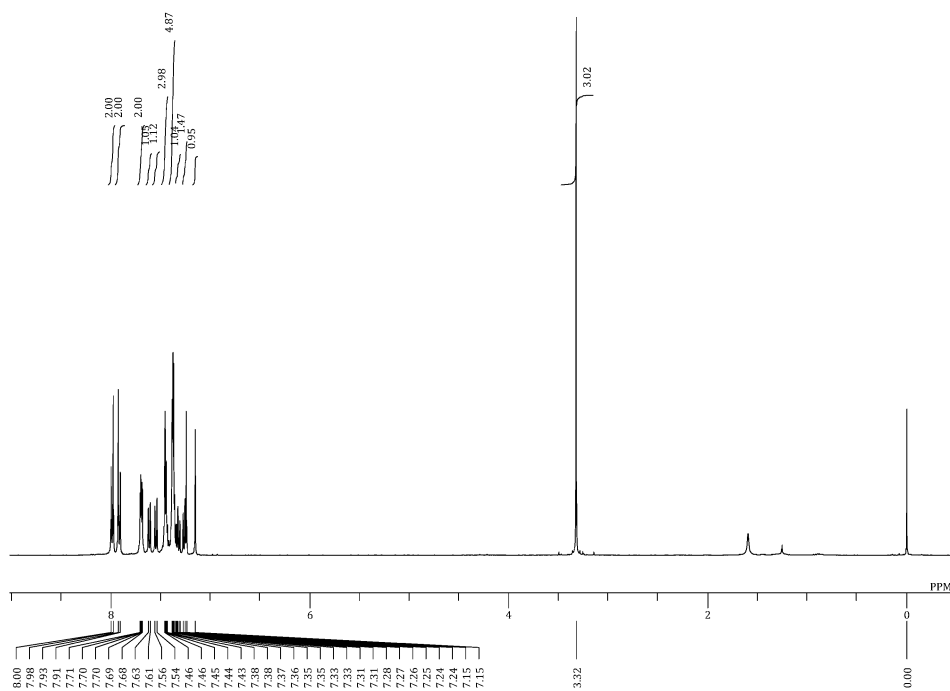

<sup>13</sup>C-NMR

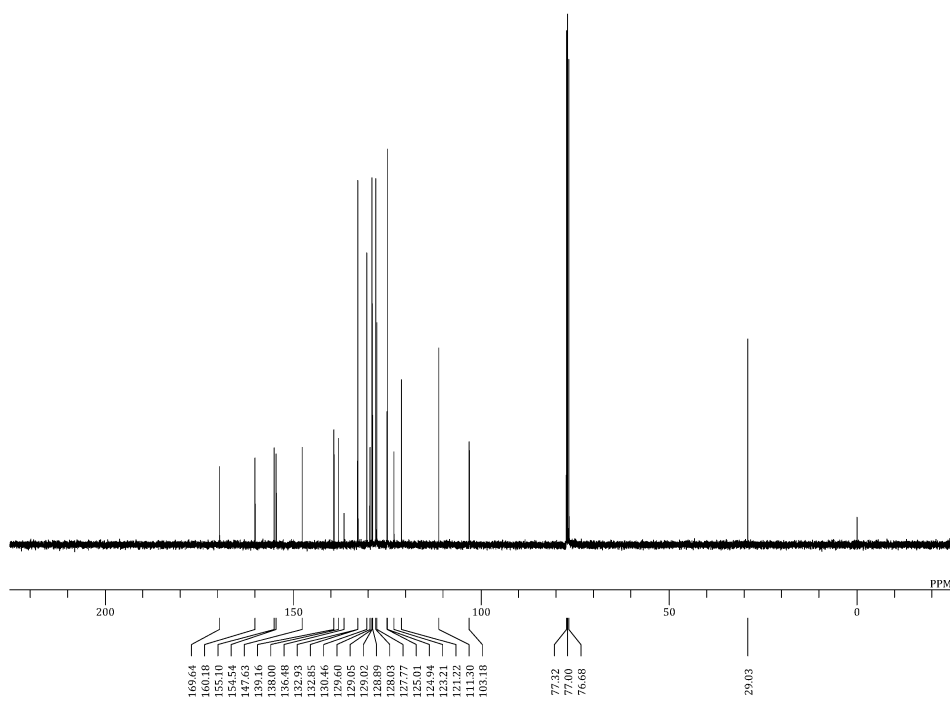

Compound **1g**

<sup>1</sup>H-NMR

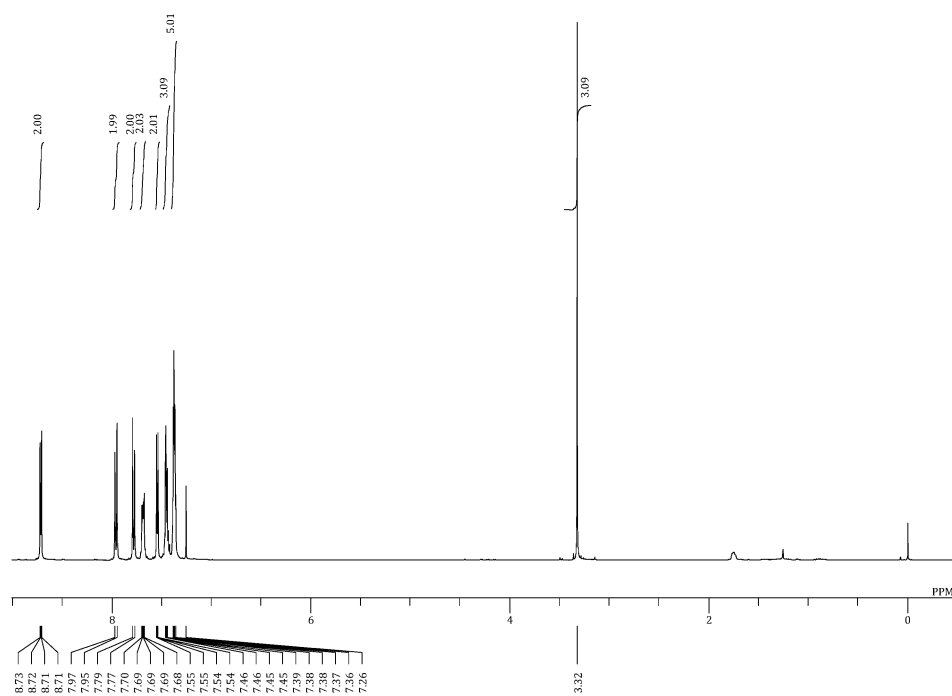

<sup>13</sup>C-NMR

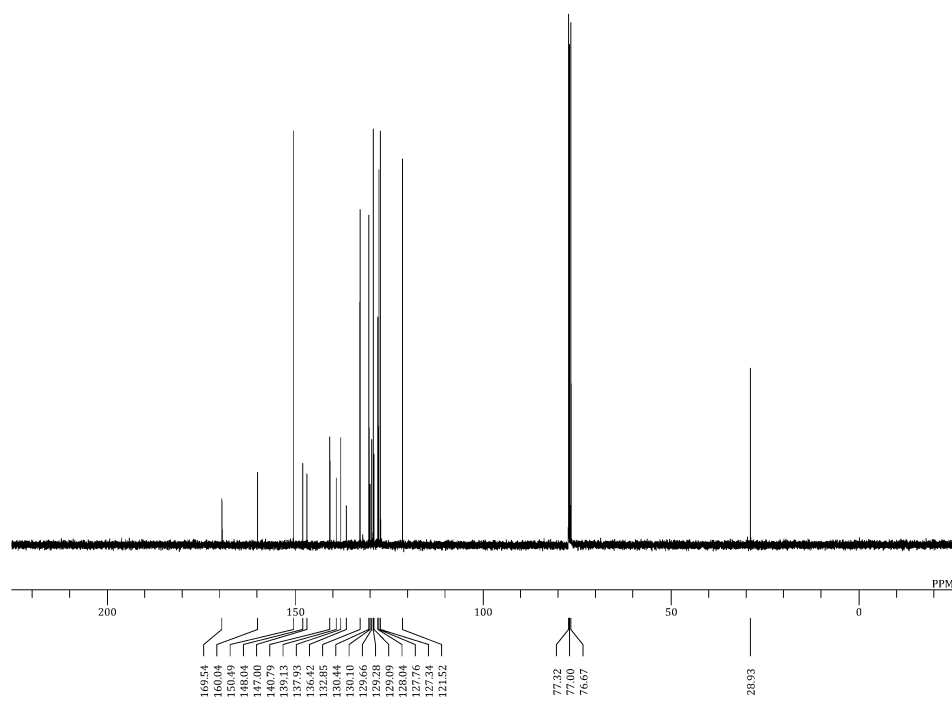

Compound **1h**

$^1\text{H-NMR}$

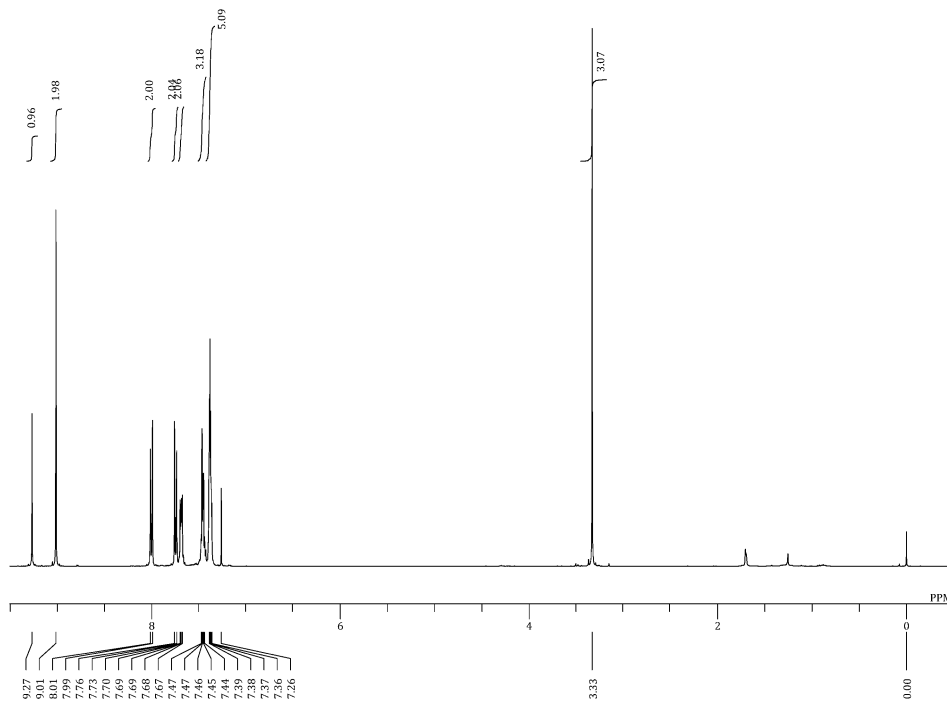

$^{13}\text{C-NMR}$

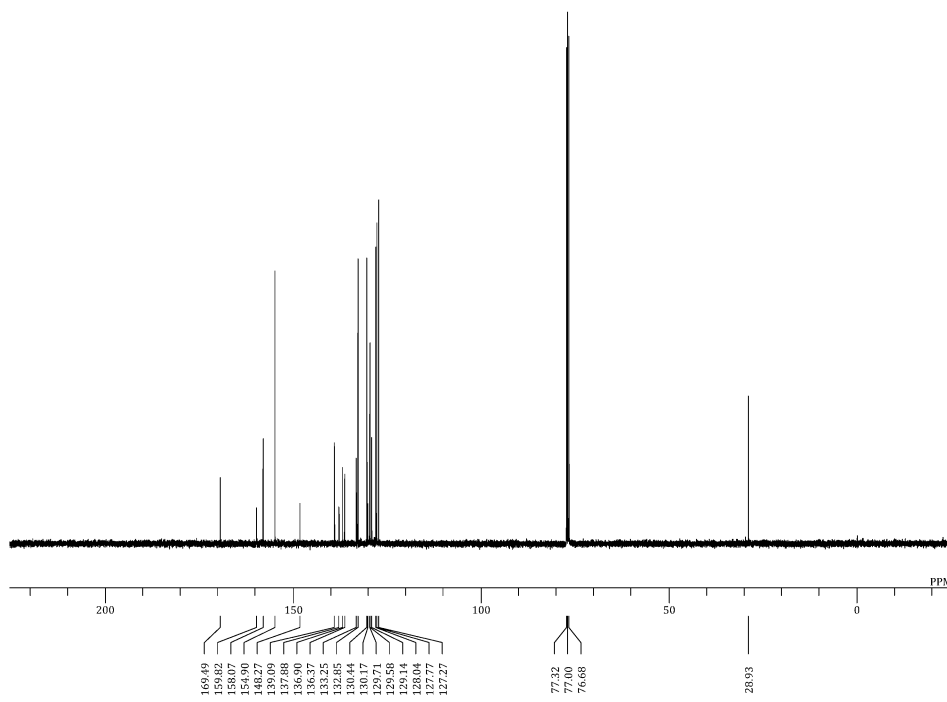

### 3. Mol2 files, energies and number of imaginary frequencies for computed structures

DAIN 1a:

E = -1302.359366 hartrees

No imaginary frequencies

mol2 file:

```
#  
#           File Created by: Spartan '18 Export  
#
```

@<TRIPOS>MOLECULE

M0001

54 58

SMALL

NO\_CHARGES

@<TRIPOS>ATOM

|    |     |              |              |              |      |   |        |
|----|-----|--------------|--------------|--------------|------|---|--------|
| 1  | N1  | -0.636601313 | -0.339439831 | -0.077224483 | N.2  | 1 | noname |
| 2  | C2  | -1.489704320 | -1.433994599 | -0.262125079 | C.2  | 1 | noname |
| 3  | C3  | -0.650613716 | -2.665785216 | -0.362875331 | C.2  | 1 | noname |
| 4  | N4  | 0.653455234  | -2.169170951 | -0.268445483 | N.am | 1 | noname |
| 5  | C5  | 0.575014595  | -0.792926123 | -0.078425631 | C.2  | 1 | noname |
| 6  | O6  | -0.920867222 | -3.842374099 | -0.495746661 | O.2  | 1 | noname |
| 7  | C7  | -2.838145512 | -1.339346792 | -0.397843357 | C.2  | 1 | noname |
| 8  | C8  | 1.783068992  | -3.067194278 | -0.162838431 | C.3  | 1 | noname |
| 9  | C9  | -3.523245276 | -0.024727073 | -0.451080040 | C.ar | 1 | noname |
| 10 | C10 | -4.883165108 | 2.426948209  | -0.534532248 | C.ar | 1 | noname |
| 11 | C11 | -2.974807427 | 1.075047876  | -1.122257791 | C.ar | 1 | noname |
| 12 | C12 | -4.771075699 | 0.127190909  | 0.167057282  | C.ar | 1 | noname |
| 13 | C13 | -5.438769396 | 1.343525367  | 0.136549500  | C.ar | 1 | noname |
| 14 | C14 | -3.652943639 | 2.285198753  | -1.167112166 | C.ar | 1 | noname |
| 15 | C15 | -3.707770675 | -2.540994539 | -0.486545996 | C.ar | 1 | noname |
| 16 | C16 | -5.415628634 | -4.751164963 | -0.654749449 | C.ar | 1 | noname |
| 17 | C17 | -4.644070384 | -2.642348995 | -1.520756481 | C.ar | 1 | noname |
| 18 | C18 | -3.651019689 | -3.557518133 | 0.468910937  | C.ar | 1 | noname |
| 19 | C19 | -4.502304906 | -4.650706076 | 0.388607143  | C.ar | 1 | noname |
| 20 | C20 | -5.482234266 | -3.744932368 | -1.612276755 | C.ar | 1 | noname |
| 21 | H21 | -6.192963850 | -3.814956682 | -2.429919682 | H    | 1 | noname |
| 22 | H22 | -4.706723013 | -1.850578552 | -2.260456364 | H    | 1 | noname |
| 23 | H23 | -4.448324617 | -5.429510498 | 1.142809936  | H    | 1 | noname |
| 24 | H24 | -2.936320737 | -3.486130949 | 1.280496552  | H    | 1 | noname |
| 25 | H25 | -5.213566194 | -0.716637074 | 0.685306346  | H    | 1 | noname |
| 26 | H26 | -6.398228470 | 1.442741677  | 0.634788085  | H    | 1 | noname |
| 27 | H27 | -5.408363123 | 3.376670070  | -0.567884772 | H    | 1 | noname |
| 28 | H28 | -3.216070622 | 3.123427758  | -1.701261078 | H    | 1 | noname |
| 29 | H29 | -2.012445475 | 0.974394690  | -1.605922668 | H    | 1 | noname |
| 30 | H30 | 1.375474309  | -4.057786820 | 0.045265171  | H    | 1 | noname |
| 31 | H31 | 2.447477691  | -2.760605720 | 0.647234362  | H    | 1 | noname |
| 32 | H32 | -6.076975596 | -5.609801547 | -0.719467054 | H    | 1 | noname |
| 33 | C33 | 1.737508005  | 0.083466408  | 0.126967321  | C.ar | 1 | noname |
| 34 | C34 | 3.871618803  | 1.879599252  | 0.544236762  | C.ar | 1 | noname |
| 35 | C35 | 2.997944503  | -0.169349448 | -0.417557009 | C.ar | 1 | noname |
| 36 | C36 | 1.552179854  | 1.253966576  | 0.869460534  | C.ar | 1 | noname |
| 37 | C37 | 2.602072969  | 2.131580977  | 1.076811729  | C.ar | 1 | noname |
| 38 | C38 | 4.045213327  | 0.717414096  | -0.211345293 | C.ar | 1 | noname |
| 39 | H39 | 2.351077610  | -3.120256886 | -1.096430330 | H    | 1 | noname |
| 40 | H40 | 0.570148920  | 1.454479353  | 1.282112248  | H    | 1 | noname |
| 41 | H41 | 3.163836740  | -1.041808534 | -1.037993403 | H    | 1 | noname |
| 42 | H42 | 2.443755664  | 3.017177177  | 1.683826523  | H    | 1 | noname |
| 43 | H43 | 5.007855149  | 0.517980049  | -0.671037604 | H    | 1 | noname |
| 44 | C44 | 4.996855982  | 2.818698930  | 0.769617328  | C.ar | 1 | noname |
| 45 | C45 | 7.126556113  | 4.594735091  | 1.195008592  | C.ar | 1 | noname |
| 46 | C46 | 4.786842906  | 4.200796069  | 0.774237148  | C.ar | 1 | noname |
| 47 | C47 | 6.294334783  | 2.343654906  | 0.982425219  | C.ar | 1 | noname |
| 48 | C48 | 7.349182227  | 3.222501470  | 1.193272126  | C.ar | 1 | noname |
| 49 | C49 | 5.841074071  | 5.080522395  | 0.984484230  | C.ar | 1 | noname |
| 50 | H50 | 6.473288818  | 1.273149007  | 1.007350295  | H    | 1 | noname |
| 51 | H51 | 7.950455880  | 5.281945511  | 1.359762923  | H    | 1 | noname |
| 52 | H52 | 8.347842908  | 2.832469305  | 1.364581521  | H    | 1 | noname |
| 53 | H53 | 5.657784782  | 6.150610861  | 0.976296955  | H    | 1 | noname |
| 54 | H54 | 3.791028047  | 4.590154003  | 0.586633870  | H    | 1 | noname |

@<TRIPOS>BOND

|    |    |    |    |
|----|----|----|----|
| 1  | 1  | 2  | 1  |
| 2  | 1  | 5  | 2  |
| 3  | 2  | 3  | 1  |
| 4  | 3  | 4  | am |
| 5  | 4  | 5  | 1  |
| 6  | 3  | 6  | 2  |
| 7  | 2  | 7  | 2  |
| 8  | 4  | 8  | 1  |
| 9  | 9  | 12 | ar |
| 10 | 12 | 13 | ar |
| 11 | 10 | 13 | ar |
| 12 | 10 | 14 | ar |
| 13 | 11 | 14 | ar |
| 14 | 9  | 11 | ar |
| 15 | 7  | 9  | 1  |
| 16 | 15 | 18 | ar |
| 17 | 18 | 19 | ar |
| 18 | 16 | 19 | ar |
| 19 | 16 | 20 | ar |
| 20 | 17 | 20 | ar |
| 21 | 15 | 17 | ar |
| 22 | 7  | 15 | 1  |
| 23 | 20 | 21 | 1  |
| 24 | 17 | 22 | 1  |
| 25 | 19 | 23 | 1  |
| 26 | 18 | 24 | 1  |
| 27 | 12 | 25 | 1  |
| 28 | 13 | 26 | 1  |
| 29 | 10 | 27 | 1  |
| 30 | 14 | 28 | 1  |
| 31 | 11 | 29 | 1  |
| 32 | 8  | 30 | 1  |
| 33 | 8  | 31 | 1  |
| 34 | 16 | 32 | 1  |
| 35 | 33 | 36 | ar |
| 36 | 36 | 37 | ar |
| 37 | 34 | 37 | ar |
| 38 | 34 | 38 | ar |
| 39 | 35 | 38 | ar |
| 40 | 33 | 35 | ar |
| 41 | 5  | 33 | 1  |
| 42 | 8  | 39 | 1  |
| 43 | 36 | 40 | 1  |
| 44 | 35 | 41 | 1  |
| 45 | 37 | 42 | 1  |
| 46 | 38 | 43 | 1  |
| 47 | 44 | 47 | ar |
| 48 | 47 | 48 | ar |
| 49 | 45 | 48 | ar |
| 50 | 45 | 49 | ar |
| 51 | 46 | 49 | ar |
| 52 | 44 | 46 | ar |
| 53 | 34 | 44 | 1  |
| 54 | 47 | 50 | 1  |
| 55 | 45 | 51 | 1  |
| 56 | 48 | 52 | 1  |
| 57 | 49 | 53 | 1  |
| 58 | 46 | 54 | 1  |

**DAIN 1b:**

E = -1416.837295 hartrees

No imaginary frequencies

mol2 file:

#

# File Created by: Spartan '18 Export

#

@<TRIPOS>MOLECULE

M0002

58 62

SMALL

NO\_CHARGES

@<TRIPOS>ATOM

|    |     |              |              |              |      |   |        |
|----|-----|--------------|--------------|--------------|------|---|--------|
| 1  | N1  | -1.239494329 | -0.775265835 | -0.101378889 | N.2  | 1 | noname |
| 2  | C2  | -2.147323511 | -1.836340341 | -0.199534081 | C.2  | 1 | noname |
| 3  | C3  | -1.370067959 | -3.112043634 | -0.230235137 | C.2  | 1 | noname |
| 4  | N4  | -0.042526692 | -2.674796967 | -0.189118027 | N.am | 1 | noname |
| 5  | C5  | -0.050898078 | -1.286602114 | -0.090904753 | C.2  | 1 | noname |
| 6  | O6  | -1.699098365 | -4.280143186 | -0.279908782 | O.2  | 1 | noname |
| 7  | C7  | -3.491987245 | -1.686285711 | -0.321303732 | C.2  | 1 | noname |
| 8  | C8  | 1.044883482  | -3.617950734 | -0.042224209 | C.3  | 1 | noname |
| 9  | C9  | -4.117258054 | -0.347382000 | -0.451475646 | C.ar | 1 | noname |
| 10 | C10 | -5.366496992 | 2.153876493  | -0.677781560 | C.ar | 1 | noname |
| 11 | C11 | -3.527007252 | 0.682689133  | -1.194176874 | C.ar | 1 | noname |
| 12 | C12 | -5.350586800 | -0.100420197 | -0.165441389 | C.ar | 1 | noname |
| 13 | C13 | -5.963309727 | 1.140608357  | 0.063697772  | C.ar | 1 | noname |
| 14 | C14 | -4.150284936 | 1.917347674  | -1.309266982 | C.ar | 1 | noname |
| 15 | C15 | -4.416947194 | -2.849563328 | -0.317171521 | C.ar | 1 | noname |
| 16 | C16 | -6.225751847 | -4.984615552 | -0.311548419 | C.ar | 1 | noname |
| 17 | C17 | -5.368454407 | -2.981416078 | -1.333769377 | C.ar | 1 | noname |
| 18 | C18 | -4.395776135 | -3.796468245 | 0.708580632  | C.ar | 1 | noname |
| 19 | C19 | -5.296880633 | -4.852005691 | 0.714326799  | C.ar | 1 | noname |
| 20 | C20 | -6.257161340 | -4.047693824 | -1.338646347 | C.ar | 1 | noname |
| 21 | H21 | -6.979584017 | -4.143150569 | -2.143377437 | H    | 1 | noname |
| 22 | H22 | -5.403276357 | -2.242595378 | -2.128113132 | H    | 1 | noname |
| 23 | H23 | -5.269746126 | -5.576490220 | 1.522223171  | H    | 1 | noname |
| 24 | H24 | -3.669106080 | -3.700415655 | 1.506961456  | H    | 1 | noname |
| 25 | H25 | -5.825414662 | -0.889222232 | 0.738742003  | H    | 1 | noname |
| 26 | H26 | -6.912256024 | 1.314097652  | 0.561768202  | H    | 1 | noname |
| 27 | H27 | -5.848882885 | 3.122594997  | -0.766435778 | H    | 1 | noname |
| 28 | H28 | -3.681507953 | 2.700068400  | -1.897835659 | H    | 1 | noname |
| 29 | H29 | -2.575021843 | 0.508661732  | -1.677421702 | H    | 1 | noname |
| 30 | H30 | 0.595270898  | -4.570787051 | 0.241714336  | H    | 1 | noname |
| 31 | H31 | 1.740735709  | -3.289304147 | 0.731949728  | H    | 1 | noname |
| 32 | H32 | -6.926331055 | -5.814086464 | -0.308771592 | H    | 1 | noname |
| 33 | C33 | 1.156152767  | -0.457846919 | 0.036583841  | C.ar | 1 | noname |
| 34 | C34 | 3.384665318  | 1.254817563  | 0.296942478  | C.ar | 1 | noname |
| 35 | C35 | 1.043148301  | 0.767530927  | 0.701205845  | C.ar | 1 | noname |
| 36 | C36 | 2.392444534  | -0.808445180 | -0.509501291 | C.ar | 1 | noname |
| 37 | C37 | 3.484804242  | 0.037346610  | -0.382265544 | C.ar | 1 | noname |
| 38 | C38 | 2.138708928  | 1.602276311  | 0.833329650  | C.ar | 1 | noname |
| 39 | H39 | 1.589150089  | -3.762323943 | -0.980287870 | H    | 1 | noname |
| 40 | H40 | 2.503839098  | -1.727372872 | -1.072433589 | H    | 1 | noname |
| 41 | H41 | 0.080549332  | 1.043900372  | 1.115918065  | H    | 1 | noname |
| 42 | H42 | 4.426207104  | -0.239849992 | -0.845677850 | H    | 1 | noname |
| 43 | H43 | 2.035548665  | 2.531057718  | 1.385219582  | H    | 1 | noname |
| 44 | C44 | 4.556732253  | 2.148789184  | 0.439006601  | C.ar | 1 | noname |
| 45 | C45 | 6.784982298  | 3.847240159  | 0.706176403  | C.ar | 1 | noname |
| 46 | C46 | 5.844908581  | 1.630583453  | 0.631112751  | C.ar | 1 | noname |
| 47 | C47 | 4.420469188  | 3.534827041  | 0.385300953  | C.ar | 1 | noname |
| 48 | C48 | 5.514432664  | 4.384995909  | 0.515666811  | C.ar | 1 | noname |
| 49 | C49 | 6.941913056  | 2.460382888  | 0.763459223  | C.ar | 1 | noname |
| 50 | H50 | 3.440624496  | 3.969100467  | 0.212512588  | H    | 1 | noname |
| 51 | H51 | 5.363384156  | 5.455823903  | 0.457786461  | H    | 1 | noname |
| 52 | H52 | 7.936962948  | 2.059379281  | 0.922548352  | H    | 1 | noname |
| 53 | H53 | 5.983882088  | 0.556303947  | 0.702484045  | H    | 1 | noname |
| 54 | O54 | 7.920304304  | 4.578241191  | 0.845877993  | O.3  | 1 | noname |
| 55 | C55 | 7.815847557  | 5.984872096  | 0.804465596  | C.3  | 1 | noname |
| 56 | H56 | 7.175253394  | 6.364641253  | 1.609501919  | H    | 1 | noname |
| 57 | H57 | 8.827717063  | 6.367486955  | 0.939854166  | H    | 1 | noname |
| 58 | H58 | 7.424915988  | 6.331342396  | -0.159793033 | H    | 1 | noname |

@<TRIPOS>BOND

|    |    |    |    |
|----|----|----|----|
| 1  | 1  | 2  | 1  |
| 2  | 1  | 5  | 2  |
| 3  | 2  | 3  | 1  |
| 4  | 3  | 4  | am |
| 5  | 4  | 5  | 1  |
| 6  | 3  | 6  | 2  |
| 7  | 2  | 7  | 2  |
| 8  | 4  | 8  | 1  |
| 9  | 9  | 12 | ar |
| 10 | 12 | 13 | ar |
| 11 | 10 | 13 | ar |
| 12 | 10 | 14 | ar |
| 13 | 11 | 14 | ar |
| 14 | 9  | 11 | ar |



|    |    |    |    |
|----|----|----|----|
| 15 | 7  | 9  | 1  |
| 16 | 15 | 18 | ar |
| 17 | 18 | 19 | ar |
| 18 | 16 | 19 | ar |
| 19 | 16 | 20 | ar |
| 20 | 17 | 20 | ar |
| 21 | 15 | 17 | ar |
| 22 | 7  | 15 | 1  |
| 23 | 20 | 21 | 1  |
| 24 | 17 | 22 | 1  |
| 25 | 19 | 23 | 1  |
| 26 | 18 | 24 | 1  |
| 27 | 12 | 25 | 1  |
| 28 | 13 | 26 | 1  |
| 29 | 10 | 27 | 1  |
| 30 | 14 | 28 | 1  |
| 31 | 11 | 29 | 1  |
| 32 | 8  | 30 | 1  |
| 33 | 8  | 31 | 1  |
| 34 | 16 | 32 | 1  |
| 35 | 33 | 36 | ar |
| 36 | 36 | 37 | ar |
| 37 | 34 | 37 | ar |
| 38 | 34 | 38 | ar |
| 39 | 35 | 38 | ar |
| 40 | 33 | 35 | ar |
| 41 | 5  | 33 | 1  |
| 42 | 8  | 39 | 1  |
| 43 | 36 | 40 | 1  |
| 44 | 35 | 41 | 1  |
| 45 | 37 | 42 | 1  |
| 46 | 38 | 43 | 1  |
| 47 | 44 | 47 | ar |
| 48 | 47 | 48 | ar |
| 49 | 45 | 48 | ar |
| 50 | 45 | 49 | ar |
| 51 | 46 | 49 | ar |
| 52 | 44 | 46 | ar |
| 53 | 34 | 44 | 1  |
| 54 | 47 | 50 | 1  |
| 55 | 48 | 51 | 1  |
| 56 | 49 | 52 | 1  |
| 57 | 46 | 53 | 1  |
| 58 | 45 | 54 | 1  |
| 59 | 54 | 55 | 1  |
| 60 | 55 | 56 | 1  |
| 61 | 55 | 57 | 1  |
| 62 | 55 | 58 | 1  |

DAIN 1c:

E = -1454.939357 hartrees

No imaginary frequencies

mol2 file:

```
#
#           File Created by: Spartan '18 Export
#
```

@<TRIPOS>MOLECULE

M0003

59 63

SMALL

NO\_CHARGES

@<TRIPOS>ATOM

|    |     |              |              |              |      |   |        |
|----|-----|--------------|--------------|--------------|------|---|--------|
| 1  | N1  | -1.374508970 | -0.886867285 | -0.175163458 | N.2  | 1 | noname |
| 2  | C2  | -2.263694536 | -1.955585802 | -0.341708539 | C.2  | 1 | noname |
| 3  | C3  | -1.465491468 | -3.214742358 | -0.433674743 | C.2  | 1 | noname |
| 4  | N4  | -0.144988095 | -2.758903613 | -0.353972789 | N.am | 1 | noname |
| 5  | C5  | -0.178410979 | -1.379304223 | -0.179679823 | C.2  | 1 | noname |
| 6  | O6  | -1.773906665 | -4.383337752 | -0.551554686 | O.2  | 1 | noname |
| 7  | C7  | -3.609345358 | -1.818016364 | -0.470380727 | C.2  | 1 | noname |
| 8  | C8  | 0.956422340  | -3.691358794 | -0.247084057 | C.3  | 1 | noname |
| 9  | C9  | -4.249737193 | -0.481646473 | -0.537271824 | C.ar | 1 | noname |
| 10 | C10 | -5.525903638 | 2.013358828  | -0.646123629 | C.ar | 1 | noname |

|    |     |              |              |              |      |   |        |
|----|-----|--------------|--------------|--------------|------|---|--------|
| 11 | C11 | -3.670319531 | 0.588526602  | -1.229711740 | C.ar | 1 | noname |
| 12 | C12 | -5.486025525 | -0.278164378 | 0.089135417  | C.ar | 1 | noname |
| 13 | C13 | -6.111996964 | 0.959724646  | 0.045998633  | C.ar | 1 | noname |
| 14 | C14 | -4.307102157 | 1.820375691  | -1.287160528 | C.ar | 1 | noname |
| 15 | C15 | -4.519000899 | -2.990801413 | -0.537820749 | C.ar | 1 | noname |
| 16 | C16 | -6.299628526 | -5.145108174 | -0.667391699 | C.ar | 1 | noname |
| 17 | C17 | -5.467184190 | -3.072240547 | -1.562968576 | C.ar | 1 | noname |
| 18 | C18 | -4.487085341 | -3.998341467 | 0.428272429  | C.ar | 1 | noname |
| 19 | C19 | -5.374536969 | -5.063589627 | 0.367157688  | C.ar | 1 | noname |
| 20 | C20 | -6.341637952 | -4.147623158 | -1.635367052 | C.ar | 1 | noname |
| 21 | H21 | -7.061324108 | -4.203119930 | -2.446231370 | H    | 1 | noname |
| 22 | H22 | -5.510218273 | -2.286961847 | -2.310916559 | H    | 1 | noname |
| 23 | H23 | -5.339657896 | -5.835567826 | 1.129428562  | H    | 1 | noname |
| 24 | H24 | -3.763483818 | -3.941877064 | 1.233082211  | H    | 1 | noname |
| 25 | H25 | -5.952426010 | -1.098604016 | 0.623742198  | H    | 1 | noname |
| 26 | H26 | -7.062959367 | 1.099157584  | 0.550795562  | H    | 1 | noname |
| 27 | H27 | -6.018862754 | 2.979794175  | -0.689389395 | H    | 1 | noname |
| 28 | H28 | -3.847134390 | 2.635058227  | -1.838064735 | H    | 1 | noname |
| 29 | H29 | -2.716822965 | 0.447647665  | -1.720976662 | H    | 1 | noname |
| 30 | H30 | 0.518840390  | -4.666546136 | -0.027676665 | H    | 1 | noname |
| 31 | H31 | 1.635204122  | -3.399286467 | 0.556448713  | H    | 1 | noname |
| 32 | H32 | -6.989265997 | -5.982188657 | -0.717115160 | H    | 1 | noname |
| 33 | C33 | 1.012028340  | -0.536001882 | 0.005946314  | C.ar | 1 | noname |
| 34 | C34 | 3.200143874  | 1.200098374  | 0.382622450  | C.ar | 1 | noname |
| 35 | C35 | 0.866341604  | 0.649821028  | 0.732696146  | C.ar | 1 | noname |
| 36 | C36 | 2.260374677  | -0.834996540 | -0.542756112 | C.ar | 1 | noname |
| 37 | C37 | 3.335585798  | 0.021969709  | -0.355515082 | C.ar | 1 | noname |
| 38 | C38 | 1.942752718  | 1.499206028  | 0.919419151  | C.ar | 1 | noname |
| 39 | H39 | 1.516361244  | -3.770602066 | -1.183668408 | H    | 1 | noname |
| 40 | H40 | 2.395955754  | -1.721281718 | -1.150630559 | H    | 1 | noname |
| 41 | H41 | -0.106517877 | 0.885174453  | 1.148469417  | H    | 1 | noname |
| 42 | H42 | 4.288920193  | -0.214046824 | -0.817120345 | H    | 1 | noname |
| 43 | H43 | 1.814482866  | 2.397858041  | 1.514161836  | H    | 1 | noname |
| 44 | C44 | 4.353643693  | 2.107867053  | 0.585600785  | C.ar | 1 | noname |
| 45 | C45 | 6.544723437  | 3.831203339  | 0.968233921  | C.ar | 1 | noname |
| 46 | C46 | 5.641671413  | 1.598177064  | 0.788778120  | C.ar | 1 | noname |
| 47 | C47 | 4.183918767  | 3.495158770  | 0.578223190  | C.ar | 1 | noname |
| 48 | C48 | 5.263944924  | 4.345844246  | 0.767226744  | C.ar | 1 | noname |
| 49 | C49 | 6.719291375  | 2.446188685  | 0.977011604  | C.ar | 1 | noname |
| 50 | H50 | 3.198784369  | 3.912988174  | 0.397818179  | H    | 1 | noname |
| 51 | H51 | 5.099526270  | 5.418034955  | 0.749060324  | H    | 1 | noname |
| 52 | H52 | 7.717618460  | 2.056649993  | 1.142486973  | H    | 1 | noname |
| 53 | H53 | 5.791512103  | 0.523784212  | 0.823575558  | H    | 1 | noname |
| 54 | C54 | 7.746105926  | 4.697384701  | 1.176951481  | C.2  | 1 | noname |
| 55 | C55 | 7.575158370  | 6.200395375  | 1.157595369  | C.3  | 1 | noname |
| 56 | O56 | 8.839957669  | 4.199305015  | 1.359567935  | O.2  | 1 | noname |
| 57 | H57 | 8.550148422  | 6.663138746  | 1.309998674  | H    | 1 | noname |
| 58 | H58 | 6.889432180  | 6.526962429  | 1.946139375  | H    | 1 | noname |
| 59 | H59 | 7.160327116  | 6.535858592  | 0.201450709  | H    | 1 | noname |

@<TRIPOS>BOND

|    |    |    |    |
|----|----|----|----|
| 1  | 1  | 2  | 1  |
| 2  | 1  | 5  | 2  |
| 3  | 2  | 3  | 1  |
| 4  | 3  | 4  | am |
| 5  | 4  | 5  | 1  |
| 6  | 3  | 6  | 2  |
| 7  | 2  | 7  | 2  |
| 8  | 4  | 8  | 1  |
| 9  | 9  | 12 | ar |
| 10 | 12 | 13 | ar |
| 11 | 10 | 13 | ar |
| 12 | 10 | 14 | ar |
| 13 | 11 | 14 | ar |
| 14 | 9  | 11 | ar |
| 15 | 7  | 9  | 1  |
| 16 | 15 | 18 | ar |
| 17 | 18 | 19 | ar |
| 18 | 16 | 19 | ar |
| 19 | 16 | 20 | ar |
| 20 | 17 | 20 | ar |
| 21 | 15 | 17 | ar |
| 22 | 7  | 15 | 1  |
| 23 | 20 | 21 | 1  |

|    |    |    |    |
|----|----|----|----|
| 24 | 17 | 22 | 1  |
| 25 | 19 | 23 | 1  |
| 26 | 18 | 24 | 1  |
| 27 | 12 | 25 | 1  |
| 28 | 13 | 26 | 1  |
| 29 | 10 | 27 | 1  |
| 30 | 14 | 28 | 1  |
| 31 | 11 | 29 | 1  |
| 32 | 8  | 30 | 1  |
| 33 | 8  | 31 | 1  |
| 34 | 16 | 32 | 1  |
| 35 | 33 | 36 | ar |
| 36 | 36 | 37 | ar |
| 37 | 34 | 37 | ar |
| 38 | 34 | 38 | ar |
| 39 | 35 | 38 | ar |
| 40 | 33 | 35 | ar |
| 41 | 5  | 33 | 1  |
| 42 | 8  | 39 | 1  |
| 43 | 36 | 40 | 1  |
| 44 | 35 | 41 | 1  |
| 45 | 37 | 42 | 1  |
| 46 | 38 | 43 | 1  |
| 47 | 44 | 47 | ar |
| 48 | 47 | 48 | ar |
| 49 | 45 | 48 | ar |
| 50 | 45 | 49 | ar |
| 51 | 46 | 49 | ar |
| 52 | 44 | 46 | ar |
| 53 | 34 | 44 | 1  |
| 54 | 47 | 50 | 1  |
| 55 | 48 | 51 | 1  |
| 56 | 49 | 52 | 1  |
| 57 | 46 | 53 | 1  |
| 58 | 45 | 54 | 1  |
| 59 | 54 | 55 | 1  |
| 60 | 54 | 56 | 2  |
| 61 | 55 | 57 | 1  |
| 62 | 55 | 58 | 1  |
| 63 | 55 | 59 | 1  |

DAIN 1d:

E = -1300.166601 hartrees

No imaginary frequencies

mol2 file:

#

# File Created by: Spartan '18 Export

#

@<TRIPOS>MOLECULE

M0002

51 55

SMALL

NO\_CHARGES

@<TRIPOS>ATOM

|    |     |              |              |              |      |   |        |
|----|-----|--------------|--------------|--------------|------|---|--------|
| 1  | N1  | 0.250302313  | -0.009510634 | 0.098545447  | N.2  | 1 | noname |
| 2  | C2  | 1.137650229  | 0.086725680  | 1.176557270  | C.2  | 1 | noname |
| 3  | C3  | 0.334549709  | 0.212854911  | 2.429772001  | C.2  | 1 | noname |
| 4  | N4  | -0.983506405 | 0.223853559  | 1.961966412  | N.am | 1 | noname |
| 5  | C5  | -0.948687382 | 0.065412725  | 0.579923418  | C.2  | 1 | noname |
| 6  | O6  | 0.638950315  | 0.293379215  | 3.602716414  | O.2  | 1 | noname |
| 7  | C7  | 2.490020270  | 0.131886190  | 1.054493968  | C.2  | 1 | noname |
| 8  | C8  | -2.096911498 | 0.172935455  | 2.884752886  | C.3  | 1 | noname |
| 9  | C9  | 3.150951512  | 0.170811220  | -0.272652746 | C.ar | 1 | noname |
| 10 | C10 | 4.465767986  | 0.219558862  | -2.749839138 | C.ar | 1 | noname |
| 11 | C11 | 2.625084002  | 0.898436273  | -1.347494133 | C.ar | 1 | noname |
| 12 | C12 | 4.353906973  | -0.521595485 | -0.462628100 | C.ar | 1 | noname |
| 13 | C13 | 4.998594073  | -0.507737383 | -1.691514634 | C.ar | 1 | noname |
| 14 | C14 | 3.281109460  | 0.925469598  | -2.570237617 | C.ar | 1 | noname |
| 15 | C15 | 3.388053045  | 0.130198768  | 2.238399243  | C.ar | 1 | noname |
| 16 | C16 | 5.149974889  | 0.122742400  | 4.412187785  | C.ar | 1 | noname |
| 17 | C17 | 4.395648999  | 1.094686347  | 2.343732084  | C.ar | 1 | noname |
| 18 | C18 | 3.287023668  | -0.845561563 | 3.231835630  | C.ar | 1 | noname |

|    |     |              |              |              |      |   |        |
|----|-----|--------------|--------------|--------------|------|---|--------|
| 19 | C19 | 4.164751745  | -0.852624363 | 4.306815299  | C.ar | 1 | noname |
| 20 | C20 | 5.261254903  | 1.099651983  | 3.428811776  | C.ar | 1 | noname |
| 21 | H21 | 6.028138299  | 1.864500512  | 3.502654202  | H    | 1 | noname |
| 22 | H22 | 4.492795399  | 1.848610209  | 1.568978216  | H    | 1 | noname |
| 23 | H23 | 4.075241074  | -1.621542074 | 5.067756501  | H    | 1 | noname |
| 24 | H24 | 2.516515559  | -1.604109833 | 3.156808340  | H    | 1 | noname |
| 25 | H25 | 4.778687411  | -1.084299683 | 0.361550087  | H    | 1 | noname |
| 26 | H26 | 5.922436128  | -1.063257705 | -1.820249585 | H    | 1 | noname |
| 27 | H27 | 4.973500849  | 0.239587870  | -3.709399468 | H    | 1 | noname |
| 28 | H28 | 2.862904439  | 1.503582921  | -3.388588491 | H    | 1 | noname |
| 29 | H29 | 1.697567803  | 1.439667415  | -1.217571574 | H    | 1 | noname |
| 30 | H30 | -1.682066491 | -0.089799056 | 3.859248697  | H    | 1 | noname |
| 31 | H31 | -2.823555497 | -0.580375816 | 2.574752309  | H    | 1 | noname |
| 32 | H32 | 5.832269348  | 0.119287647  | 5.256757193  | H    | 1 | noname |
| 33 | C33 | -2.139950337 | -0.032378839 | -0.275132478 | C.ar | 1 | noname |
| 34 | C34 | -4.325847298 | -0.242507204 | -2.034020848 | C.ar | 1 | noname |
| 35 | C35 | -2.025374631 | -0.739594815 | -1.478141617 | C.ar | 1 | noname |
| 36 | C36 | -3.357749681 | 0.581374522  | 0.024540192  | C.ar | 1 | noname |
| 37 | C37 | -4.435164646 | 0.478579104  | -0.842420203 | C.ar | 1 | noname |
| 38 | C38 | -3.099729964 | -0.846218006 | -2.340012285 | C.ar | 1 | noname |
| 39 | H39 | -2.596270537 | 1.142119731  | 2.975933598  | H    | 1 | noname |
| 40 | H40 | -3.468724573 | 1.170725115  | 0.926510237  | H    | 1 | noname |
| 41 | H41 | -1.073048956 | -1.197747823 | -1.718702588 | H    | 1 | noname |
| 42 | H42 | -5.372347066 | 0.965965167  | -0.600418952 | H    | 1 | noname |
| 43 | H43 | -2.988511554 | -1.406034878 | -3.262850566 | H    | 1 | noname |
| 44 | C44 | -5.458927048 | -0.361007504 | -2.942025469 | C.2  | 1 | noname |
| 45 | C45 | -7.530567955 | 0.024158340  | -3.546026821 | C.2  | 1 | noname |
| 46 | C46 | -6.990433761 | -0.730603573 | -4.533142154 | C.2  | 1 | noname |
| 47 | C47 | -5.641462423 | -0.982562696 | -4.141915558 | C.2  | 1 | noname |
| 48 | O48 | -6.616998613 | 0.257583194  | -2.573855432 | O.3  | 1 | noname |
| 49 | H49 | -7.486661178 | -1.068882968 | -5.430835771 | H    | 1 | noname |
| 50 | H50 | -8.505562720 | 0.457901022  | -3.388584541 | H    | 1 | noname |
| 51 | H51 | -4.905590186 | -1.554294053 | -4.687738431 | H    | 1 | noname |

@<TRIPOS>BOND

|    |    |    |    |
|----|----|----|----|
| 1  | 1  | 2  | 1  |
| 2  | 1  | 5  | 2  |
| 3  | 2  | 3  | 1  |
| 4  | 3  | 4  | am |
| 5  | 4  | 5  | 1  |
| 6  | 3  | 6  | 2  |
| 7  | 2  | 7  | 2  |
| 8  | 4  | 8  | 1  |
| 9  | 9  | 12 | ar |
| 10 | 12 | 13 | ar |
| 11 | 10 | 13 | ar |
| 12 | 10 | 14 | ar |
| 13 | 11 | 14 | ar |
| 14 | 9  | 11 | ar |
| 15 | 7  | 9  | 1  |
| 16 | 15 | 18 | ar |
| 17 | 18 | 19 | ar |
| 18 | 16 | 19 | ar |
| 19 | 16 | 20 | ar |
| 20 | 17 | 20 | ar |
| 21 | 15 | 17 | ar |
| 22 | 7  | 15 | 1  |
| 23 | 20 | 21 | 1  |
| 24 | 17 | 22 | 1  |
| 25 | 19 | 23 | 1  |
| 26 | 18 | 24 | 1  |
| 27 | 12 | 25 | 1  |
| 28 | 13 | 26 | 1  |
| 29 | 10 | 27 | 1  |
| 30 | 14 | 28 | 1  |
| 31 | 11 | 29 | 1  |
| 32 | 8  | 30 | 1  |
| 33 | 8  | 31 | 1  |
| 34 | 16 | 32 | 1  |
| 35 | 33 | 36 | ar |
| 36 | 36 | 37 | ar |
| 37 | 34 | 37 | ar |
| 38 | 34 | 38 | ar |
| 39 | 35 | 38 | ar |

|    |    |    |    |
|----|----|----|----|
| 40 | 33 | 35 | ar |
| 41 | 5  | 33 | 1  |
| 42 | 8  | 39 | 1  |
| 43 | 36 | 40 | 1  |
| 44 | 35 | 41 | 1  |
| 45 | 37 | 42 | 1  |
| 46 | 38 | 43 | 1  |
| 47 | 44 | 47 | 2  |
| 48 | 45 | 46 | 2  |
| 49 | 46 | 47 | 1  |
| 50 | 34 | 44 | 1  |
| 51 | 45 | 48 | 1  |
| 52 | 48 | 44 | 1  |
| 53 | 46 | 49 | 1  |
| 54 | 45 | 50 | 1  |
| 55 | 47 | 51 | 1  |

DAIN 1e:

E = -1623.156126 hartrees

No imaginary frequencies

mol2 file:

```
#
#           File Created by: Spartan '18 Export
#
```

@<TRIPOS>MOLECULE

M0004

51 55

SMALL

NO\_CHARGES

@<TRIPOS>ATOM

|    |     |              |              |              |      |   |        |
|----|-----|--------------|--------------|--------------|------|---|--------|
| 1  | N1  | 0.244725085  | -0.016655986 | 0.138626996  | N.2  | 1 | noname |
| 2  | C2  | 1.170242722  | -0.002949720 | 1.188559753  | C.2  | 1 | noname |
| 3  | C3  | 0.412664528  | 0.011947458  | 2.475895889  | C.2  | 1 | noname |
| 4  | N4  | -0.921687855 | 0.049599388  | 2.057895184  | N.am | 1 | noname |
| 5  | C5  | -0.935981273 | 0.007264865  | 0.667356336  | C.2  | 1 | noname |
| 6  | O6  | 0.758953667  | -0.000370595 | 3.639856700  | O.2  | 1 | noname |
| 7  | C7  | 2.516912969  | 0.064500476  | 1.021228740  | C.2  | 1 | noname |
| 8  | C8  | -2.001481354 | -0.084919993 | 3.011831896  | C.3  | 1 | noname |
| 9  | C9  | 3.126772129  | 0.222487228  | -0.321789296 | C.ar | 1 | noname |
| 10 | C10 | 4.346667065  | 0.495943963  | -2.832785468 | C.ar | 1 | noname |
| 11 | C11 | 2.557240918  | 1.035848982  | -1.309207970 | C.ar | 1 | noname |
| 12 | C12 | 4.325221888  | -0.440768455 | -0.615550454 | C.ar | 1 | noname |
| 13 | C13 | 4.922724671  | -0.315523594 | -1.861985100 | C.ar | 1 | noname |
| 14 | C14 | 3.166271532  | 1.173975601  | -2.548762882 | C.ar | 1 | noname |
| 15 | C15 | 3.458655994  | -0.029445974 | 2.166996237  | C.ar | 1 | noname |
| 16 | C16 | 5.299750874  | -0.204608676 | 4.267010096  | C.ar | 1 | noname |
| 17 | C17 | 4.464867594  | 0.930699036  | 2.315898411  | C.ar | 1 | noname |
| 18 | C18 | 3.398897230  | -1.085342862 | 3.078615103  | C.ar | 1 | noname |
| 19 | C19 | 4.315963980  | -1.175318673 | 4.116485809  | C.ar | 1 | noname |
| 20 | C20 | 5.369915427  | 0.851753928  | 3.365316628  | C.ar | 1 | noname |
| 21 | H21 | 6.135314984  | 1.613791708  | 3.474957107  | H    | 1 | noname |
| 22 | H22 | 4.529852935  | 1.747732463  | 1.604359239  | H    | 1 | noname |
| 23 | H23 | 4.258189885  | -2.005704954 | 4.813179715  | H    | 1 | noname |
| 24 | H24 | 2.629882708  | -1.841127225 | 2.968603573  | H    | 1 | noname |
| 25 | H25 | 4.784188784  | -1.068676859 | 0.140416995  | H    | 1 | noname |
| 26 | H26 | 5.843820800  | -0.850136105 | -2.072774219 | H    | 1 | noname |
| 27 | H27 | 4.817722285  | 0.602837691  | -3.805190268 | H    | 1 | noname |
| 28 | H28 | 2.714591073  | 1.817300875  | -3.297700688 | H    | 1 | noname |
| 29 | H29 | 1.632988066  | 1.556773642  | -1.098133274 | H    | 1 | noname |
| 30 | H30 | -1.550758598 | -0.422001277 | 3.946644178  | H    | 1 | noname |
| 31 | H31 | -2.734583497 | -0.816857262 | 2.667576934  | H    | 1 | noname |
| 32 | H32 | 6.012797620  | -0.273138663 | 5.082902205  | H    | 1 | noname |
| 33 | C33 | -2.156693971 | -0.029624179 | -0.150794971 | C.ar | 1 | noname |
| 34 | C34 | -4.407280532 | -0.113168079 | -1.846980472 | C.ar | 1 | noname |
| 35 | C35 | -3.366720189 | 0.545274498  | 0.241716865  | C.ar | 1 | noname |
| 36 | C36 | -2.082476054 | -0.636149056 | -1.409747773 | C.ar | 1 | noname |
| 37 | C37 | -3.189448827 | -0.686196638 | -2.236398279 | C.ar | 1 | noname |
| 38 | C38 | -4.471351247 | 0.507520327  | -0.596382318 | C.ar | 1 | noname |
| 39 | H39 | -2.502447115 | 0.869671575  | 3.198443595  | H    | 1 | noname |
| 40 | H40 | -1.139631130 | -1.072820893 | -1.718190619 | H    | 1 | noname |
| 41 | H41 | -3.448543018 | 1.061243506  | 1.190494024  | H    | 1 | noname |
| 42 | H42 | -3.120149313 | -1.195072983 | -3.191903166 | H    | 1 | noname |

|    |     |              |              |              |     |   |        |
|----|-----|--------------|--------------|--------------|-----|---|--------|
| 43 | H43 | -5.391451285 | 0.990013003  | -0.281837130 | H   | 1 | noname |
| 44 | C44 | -5.568882233 | -0.162027938 | -2.742342425 | C.2 | 1 | noname |
| 45 | C45 | -7.861659390 | -0.218637177 | -3.714591715 | C.2 | 1 | noname |
| 46 | C46 | -6.888825910 | -0.263391391 | -4.664834571 | C.2 | 1 | noname |
| 47 | C47 | -5.579166674 | -0.232065511 | -4.108784072 | C.2 | 1 | noname |
| 48 | S48 | -7.196765812 | -0.138370256 | -2.127262410 | S.3 | 1 | noname |
| 49 | H49 | -7.091919317 | -0.311150514 | -5.727982797 | H   | 1 | noname |
| 50 | H50 | -8.933488418 | -0.231010523 | -3.854050859 | H   | 1 | noname |
| 51 | H51 | -4.674404403 | -0.232948198 | -4.704905015 | H   | 1 | noname |

@<TRIPOS>BOND

|    |    |    |    |
|----|----|----|----|
| 1  | 1  | 2  | 1  |
| 2  | 1  | 5  | 2  |
| 3  | 2  | 3  | 1  |
| 4  | 3  | 4  | am |
| 5  | 4  | 5  | 1  |
| 6  | 3  | 6  | 2  |
| 7  | 2  | 7  | 2  |
| 8  | 4  | 8  | 1  |
| 9  | 9  | 12 | ar |
| 10 | 12 | 13 | ar |
| 11 | 10 | 13 | ar |
| 12 | 10 | 14 | ar |
| 13 | 11 | 14 | ar |
| 14 | 9  | 11 | ar |
| 15 | 7  | 9  | 1  |
| 16 | 15 | 18 | ar |
| 17 | 18 | 19 | ar |
| 18 | 16 | 19 | ar |
| 19 | 16 | 20 | ar |
| 20 | 17 | 20 | ar |
| 21 | 15 | 17 | ar |
| 22 | 7  | 15 | 1  |
| 23 | 20 | 21 | 1  |
| 24 | 17 | 22 | 1  |
| 25 | 19 | 23 | 1  |
| 26 | 18 | 24 | 1  |
| 27 | 12 | 25 | 1  |
| 28 | 13 | 26 | 1  |
| 29 | 10 | 27 | 1  |
| 30 | 14 | 28 | 1  |
| 31 | 11 | 29 | 1  |
| 32 | 8  | 30 | 1  |
| 33 | 8  | 31 | 1  |
| 34 | 16 | 32 | 1  |
| 35 | 33 | 36 | ar |
| 36 | 36 | 37 | ar |
| 37 | 34 | 37 | ar |
| 38 | 34 | 38 | ar |
| 39 | 35 | 38 | ar |
| 40 | 33 | 35 | ar |
| 41 | 5  | 33 | 1  |
| 42 | 8  | 39 | 1  |
| 43 | 36 | 40 | 1  |
| 44 | 35 | 41 | 1  |
| 45 | 37 | 42 | 1  |
| 46 | 38 | 43 | 1  |
| 47 | 44 | 47 | 2  |
| 48 | 45 | 46 | 2  |
| 49 | 46 | 47 | 1  |
| 50 | 34 | 44 | 1  |
| 51 | 45 | 48 | 1  |
| 52 | 48 | 44 | 1  |
| 53 | 46 | 49 | 1  |
| 54 | 45 | 50 | 1  |
| 55 | 47 | 51 | 1  |

DAIN 1f:

E = -1453.730711 hartrees

No imaginary frequencies

mol2 file:

#

# File Created by: Spartan '18 Export

#

@<TRIPOS>MOLECULE

M0003

57 62

SMALL

NO\_CHARGES

@<TRIPOS>ATOM

|    |     |              |              |              |      |   |        |
|----|-----|--------------|--------------|--------------|------|---|--------|
| 1  | N1  | -1.227124775 | 0.061578823  | 0.659317077  | N.2  | 1 | noname |
| 2  | C2  | -2.114359903 | -0.016701629 | 1.738875988  | C.2  | 1 | noname |
| 3  | C3  | -1.320801197 | -0.293229821 | 2.973528878  | C.2  | 1 | noname |
| 4  | N4  | -0.011533251 | -0.399354424 | 2.491944250  | N.am | 1 | noname |
| 5  | C5  | -0.038452004 | -0.154562549 | 1.122725188  | C.2  | 1 | noname |
| 6  | O6  | -1.625551999 | -0.416595287 | 4.142583094  | O.2  | 1 | noname |
| 7  | C7  | -3.465713982 | 0.071316351  | 1.626539750  | C.2  | 1 | noname |
| 8  | C8  | 1.105885311  | -0.512815132 | 3.404407004  | C.3  | 1 | noname |
| 9  | C9  | -4.130204603 | 0.170381089  | 0.304311617  | C.ar | 1 | noname |
| 10 | C10 | -5.448706876 | 0.384997594  | -2.161633248 | C.ar | 1 | noname |
| 11 | C11 | -3.680895649 | -0.546234322 | -0.811809318 | C.ar | 1 | noname |
| 12 | C12 | -5.259527361 | 0.986914428  | 0.161101531  | C.ar | 1 | noname |
| 13 | C13 | -5.904933433 | 1.102997316  | -1.061946729 | C.ar | 1 | noname |
| 14 | C14 | -4.339044302 | -0.442734850 | -2.029292158 | C.ar | 1 | noname |
| 15 | C15 | -4.356722322 | 0.088168228  | 2.815124318  | C.ar | 1 | noname |
| 16 | C16 | -6.107481875 | 0.134781053  | 4.997304758  | C.ar | 1 | noname |
| 17 | C17 | -5.456434957 | -0.774978402 | 2.866577378  | C.ar | 1 | noname |
| 18 | C18 | -4.157063693 | 0.983840836  | 3.867466469  | C.ar | 1 | noname |
| 19 | C19 | -5.029026298 | 1.010913003  | 4.946772763  | C.ar | 1 | noname |
| 20 | C20 | -6.317216965 | -0.761870645 | 3.955307684  | C.ar | 1 | noname |
| 21 | H21 | -7.157143510 | -1.448945548 | 3.986362473  | H    | 1 | noname |
| 22 | H22 | -5.629773408 | -1.464587744 | 2.046605218  | H    | 1 | noname |
| 23 | H23 | -4.862162515 | 1.717307531  | 5.753872919  | H    | 1 | noname |
| 24 | H24 | -3.314475337 | 1.664643469  | 3.834921240  | H    | 1 | noname |
| 25 | H25 | -5.625176531 | 1.543052909  | 1.017458535  | H    | 1 | noname |
| 26 | H26 | -6.769875399 | 1.752629454  | -1.153989287 | H    | 1 | noname |
| 27 | H27 | -5.958247785 | 0.466775908  | -3.116937316 | H    | 1 | noname |
| 28 | H28 | -3.981910658 | -1.014292531 | -2.880484676 | H    | 1 | noname |
| 29 | H29 | -2.811341460 | -1.182800032 | -0.717746686 | H    | 1 | noname |
| 30 | H30 | 0.721484334  | -0.276758265 | 4.398019097  | H    | 1 | noname |
| 31 | H31 | 1.898806406  | 0.188111805  | 3.136744040  | H    | 1 | noname |
| 32 | H32 | -6.785452504 | 0.153367008  | 5.845141544  | H    | 1 | noname |
| 33 | C33 | 1.151437485  | -0.117201460 | 0.260164354  | C.ar | 1 | noname |
| 34 | C34 | 3.333731598  | -0.005479375 | -1.508538760 | C.ar | 1 | noname |
| 35 | C35 | 1.093109540  | 0.666591098  | -0.898969456 | C.ar | 1 | noname |
| 36 | C36 | 2.309303894  | -0.855812746 | 0.510474390  | C.ar | 1 | noname |
| 37 | C37 | 3.386026446  | -0.801405098 | -0.362126157 | C.ar | 1 | noname |
| 38 | C38 | 2.166529008  | 0.724526443  | -1.766072227 | C.ar | 1 | noname |
| 39 | H39 | 1.512303519  | -1.528311035 | 3.427608384  | H    | 1 | noname |
| 40 | H40 | 2.371529531  | -1.503846755 | 1.375964856  | H    | 1 | noname |
| 41 | H41 | 0.184911452  | 1.222424555  | -1.100801660 | H    | 1 | noname |
| 42 | H42 | 4.276711368  | -1.384519822 | -0.160849398 | H    | 1 | noname |
| 43 | H43 | 2.100944510  | 1.344555992  | -2.653972759 | H    | 1 | noname |
| 44 | C44 | 6.820897215  | 0.726604256  | -5.105273090 | C.ar | 1 | noname |
| 45 | C45 | 7.759912259  | -1.061047423 | -3.101429383 | C.ar | 1 | noname |
| 46 | C46 | 6.005174363  | 0.391519568  | -4.019261866 | C.ar | 1 | noname |
| 47 | C47 | 8.086115553  | 0.167969702  | -5.175336260 | C.ar | 1 | noname |
| 48 | C48 | 8.550587039  | -0.714317076 | -4.187023663 | C.ar | 1 | noname |
| 49 | C49 | 6.498407747  | -0.490641185 | -3.051714642 | C.ar | 1 | noname |
| 50 | C50 | 4.679961639  | 0.732882825  | -3.580797380 | C.2  | 1 | noname |
| 51 | C51 | 4.468569867  | 0.059531677  | -2.420782986 | C.2  | 1 | noname |
| 52 | O52 | 5.566380161  | -0.693065196 | -2.080325581 | O.3  | 1 | noname |
| 53 | H53 | 3.982930228  | 1.394979133  | -4.072925306 | H    | 1 | noname |
| 54 | H54 | 6.470609947  | 1.407742614  | -5.874243338 | H    | 1 | noname |
| 55 | H55 | 8.734453482  | 0.415000364  | -6.009889644 | H    | 1 | noname |
| 56 | H56 | 9.547770796  | -1.133435106 | -4.273877659 | H    | 1 | noname |
| 57 | H57 | 8.101869854  | -1.740561574 | -2.329174163 | H    | 1 | noname |

@<TRIPOS>BOND

|   |   |   |    |
|---|---|---|----|
| 1 | 1 | 2 | 1  |
| 2 | 1 | 5 | 2  |
| 3 | 2 | 3 | 1  |
| 4 | 3 | 4 | am |
| 5 | 4 | 5 | 1  |
| 6 | 3 | 6 | 2  |

|    |    |    |    |
|----|----|----|----|
| 7  | 2  | 7  | 2  |
| 8  | 4  | 8  | 1  |
| 9  | 9  | 12 | ar |
| 10 | 12 | 13 | ar |
| 11 | 10 | 13 | ar |
| 12 | 10 | 14 | ar |
| 13 | 11 | 14 | ar |
| 14 | 9  | 11 | ar |
| 15 | 7  | 9  | 1  |
| 16 | 15 | 18 | ar |
| 17 | 18 | 19 | ar |
| 18 | 16 | 19 | ar |
| 19 | 16 | 20 | ar |
| 20 | 17 | 20 | ar |
| 21 | 15 | 17 | ar |
| 22 | 7  | 15 | 1  |
| 23 | 20 | 21 | 1  |
| 24 | 17 | 22 | 1  |
| 25 | 19 | 23 | 1  |
| 26 | 18 | 24 | 1  |
| 27 | 12 | 25 | 1  |
| 28 | 13 | 26 | 1  |
| 29 | 10 | 27 | 1  |
| 30 | 14 | 28 | 1  |
| 31 | 11 | 29 | 1  |
| 32 | 8  | 30 | 1  |
| 33 | 8  | 31 | 1  |
| 34 | 16 | 32 | 1  |
| 35 | 33 | 36 | ar |
| 36 | 36 | 37 | ar |
| 37 | 34 | 37 | ar |
| 38 | 34 | 38 | ar |
| 39 | 35 | 38 | ar |
| 40 | 33 | 35 | ar |
| 41 | 5  | 33 | 1  |
| 42 | 8  | 39 | 1  |
| 43 | 36 | 40 | 1  |
| 44 | 35 | 41 | 1  |
| 45 | 37 | 42 | 1  |
| 46 | 38 | 43 | 1  |
| 47 | 44 | 47 | ar |
| 48 | 47 | 48 | ar |
| 49 | 45 | 48 | ar |
| 50 | 45 | 49 | ar |
| 51 | 46 | 49 | ar |
| 52 | 44 | 46 | ar |
| 53 | 46 | 50 | 1  |
| 54 | 50 | 51 | 2  |
| 55 | 34 | 51 | 1  |
| 56 | 49 | 52 | 1  |
| 57 | 52 | 51 | 1  |
| 58 | 50 | 53 | 1  |
| 59 | 44 | 54 | 1  |
| 60 | 47 | 55 | 1  |
| 61 | 48 | 56 | 1  |
| 62 | 45 | 57 | 1  |

DAIN 1g:

E = -1318.397929 hartrees

No imaginary frequencies

mol2 file:

```
#
#           File Created by: Spartan '18 Export
#
```

@<TRIPOS>MOLECULE

M0002

53 57

SMALL

NO\_CHARGES

@<TRIPOS>ATOM

|   |    |             |             |             |     |   |        |
|---|----|-------------|-------------|-------------|-----|---|--------|
| 1 | N1 | 0.485605334 | 0.037390576 | 0.254121380 | N.2 | 1 | noname |
| 2 | C2 | 1.338321528 | 0.227011644 | 1.348385586 | C.2 | 1 | noname |



|    |     |              |              |              |      |   |        |
|----|-----|--------------|--------------|--------------|------|---|--------|
| 3  | C3  | 0.499389549  | 0.328683289  | 2.579227286  | C.2  | 1 | noname |
| 4  | N4  | -0.805357447 | 0.232389471  | 2.082771891  | N.am | 1 | noname |
| 5  | C5  | -0.725550522 | 0.038961079  | 0.707815379  | C.2  | 1 | noname |
| 6  | O6  | 0.768288376  | 0.463655702  | 3.755724241  | O.2  | 1 | noname |
| 7  | C7  | 2.686129236  | 0.369981253  | 1.249794393  | C.2  | 1 | noname |
| 8  | C8  | -1.934838790 | 0.135101812  | 2.982036003  | C.3  | 1 | noname |
| 9  | C9  | 3.365054778  | 0.430003786  | -0.067553674 | C.ar | 1 | noname |
| 10 | C10 | 4.712576383  | 0.527552073  | -2.524378711 | C.ar | 1 | noname |
| 11 | C11 | 2.811212679  | 1.108273436  | -1.160225196 | C.ar | 1 | noname |
| 12 | C12 | 4.612203077  | -0.187574318 | -0.228492198 | C.ar | 1 | noname |
| 13 | C13 | 5.273658018  | -0.150306926 | -1.447816847 | C.ar | 1 | noname |
| 14 | C14 | 3.483337766  | 1.160305303  | -2.373240205 | C.ar | 1 | noname |
| 15 | C15 | 3.560225878  | 0.461129187  | 2.446804541  | C.ar | 1 | noname |
| 16 | C16 | 5.277500872  | 0.635274653  | 4.648876560  | C.ar | 1 | noname |
| 17 | C17 | 4.507746276  | 1.486809755  | 2.533645329  | C.ar | 1 | noname |
| 18 | C18 | 3.497396242  | -0.483284765 | 3.473423634  | C.ar | 1 | noname |
| 19 | C19 | 4.353519093  | -0.400170855 | 4.562539864  | C.ar | 1 | noname |
| 20 | C20 | 5.350421834  | 1.581592365  | 3.632470067  | C.ar | 1 | noname |
| 21 | H21 | 6.069795216  | 2.392456759  | 3.691431151  | H    | 1 | noname |
| 22 | H22 | 4.575136701  | 2.217281188  | 1.733803057  | H    | 1 | noname |
| 23 | H23 | 4.295100613  | -1.145749301 | 5.349236704  | H    | 1 | noname |
| 24 | H24 | 2.774993250  | -1.288748425 | 3.412533370  | H    | 1 | noname |
| 25 | H25 | 5.058197489  | -0.710627192 | 0.610496578  | H    | 1 | noname |
| 26 | H26 | 6.232500313  | -0.647946016 | -1.554993889 | H    | 1 | noname |
| 27 | H27 | 5.233249675  | 0.566384378  | -3.476377270 | H    | 1 | noname |
| 28 | H28 | 3.043089040  | 1.699951943  | -3.206114478 | H    | 1 | noname |
| 29 | H29 | 1.850227917  | 1.593044609  | -1.051422993 | H    | 1 | noname |
| 30 | H30 | -1.526442864 | -0.063772024 | 3.974174676  | H    | 1 | noname |
| 31 | H31 | -2.599469475 | -0.678303946 | 2.684673138  | H    | 1 | noname |
| 32 | H32 | 5.942483361  | 0.702279155  | 5.504497393  | H    | 1 | noname |
| 33 | C33 | -1.886318377 | -0.167579450 | -0.172538816 | C.ar | 1 | noname |
| 34 | C34 | -4.008610891 | -0.577877487 | -1.975580208 | C.ar | 1 | noname |
| 35 | C35 | -3.146942924 | 0.378581928  | 0.076870173  | C.ar | 1 | noname |
| 36 | C36 | -1.695244261 | -0.909581197 | -1.342536562 | C.ar | 1 | noname |
| 37 | C37 | -2.740133060 | -1.112125992 | -2.226602488 | C.ar | 1 | noname |
| 38 | C38 | -4.191274755 | 0.173718786  | -0.813208113 | C.ar | 1 | noname |
| 39 | H39 | -2.502587989 | 1.069294907  | 3.027261912  | H    | 1 | noname |
| 40 | H40 | -0.712488119 | -1.322197702 | -1.538872776 | H    | 1 | noname |
| 41 | H41 | -3.315013484 | 0.997113512  | 0.950088748  | H    | 1 | noname |
| 42 | H42 | -2.578551536 | -1.714768420 | -3.114589231 | H    | 1 | noname |
| 43 | H43 | -5.155537043 | 0.631092124  | -0.616538053 | H    | 1 | noname |
| 44 | C44 | -5.127883125 | -0.797150366 | -2.921156648 | C.ar | 1 | noname |
| 45 | N45 | -7.256723400 | -1.211283753 | -4.719633240 | N.ar | 1 | noname |
| 46 | C46 | -4.925426957 | -0.810717957 | -4.302028688 | C.ar | 1 | noname |
| 47 | C47 | -6.434346132 | -0.998763933 | -2.473119927 | C.ar | 1 | noname |
| 48 | C48 | -7.447795892 | -1.198581416 | -3.400966853 | C.ar | 1 | noname |
| 49 | C49 | -6.008698858 | -1.018572338 | -5.145378038 | C.ar | 1 | noname |
| 50 | H50 | -6.658920605 | -1.024219588 | -1.412043662 | H    | 1 | noname |
| 51 | H51 | -8.469002168 | -1.362865135 | -3.063996194 | H    | 1 | noname |
| 52 | H52 | -5.864843715 | -1.025022042 | -6.223622924 | H    | 1 | noname |
| 53 | H53 | -3.939358109 | -0.637524130 | -4.719675170 | H    | 1 | noname |

@<TRIPOS>BOND

|    |    |    |    |
|----|----|----|----|
| 1  | 1  | 2  | 1  |
| 2  | 1  | 5  | 2  |
| 3  | 2  | 3  | 1  |
| 4  | 3  | 4  | am |
| 5  | 4  | 5  | 1  |
| 6  | 3  | 6  | 2  |
| 7  | 2  | 7  | 2  |
| 8  | 4  | 8  | 1  |
| 9  | 9  | 12 | ar |
| 10 | 12 | 13 | ar |
| 11 | 10 | 13 | ar |
| 12 | 10 | 14 | ar |
| 13 | 11 | 14 | ar |
| 14 | 9  | 11 | ar |
| 15 | 7  | 9  | 1  |
| 16 | 15 | 18 | ar |
| 17 | 18 | 19 | ar |
| 18 | 16 | 19 | ar |
| 19 | 16 | 20 | ar |
| 20 | 17 | 20 | ar |
| 21 | 15 | 17 | ar |

|    |    |    |    |
|----|----|----|----|
| 22 | 7  | 15 | 1  |
| 23 | 20 | 21 | 1  |
| 24 | 17 | 22 | 1  |
| 25 | 19 | 23 | 1  |
| 26 | 18 | 24 | 1  |
| 27 | 12 | 25 | 1  |
| 28 | 13 | 26 | 1  |
| 29 | 10 | 27 | 1  |
| 30 | 14 | 28 | 1  |
| 31 | 11 | 29 | 1  |
| 32 | 8  | 30 | 1  |
| 33 | 8  | 31 | 1  |
| 34 | 16 | 32 | 1  |
| 35 | 33 | 36 | ar |
| 36 | 36 | 37 | ar |
| 37 | 34 | 37 | ar |
| 38 | 34 | 38 | ar |
| 39 | 35 | 38 | ar |
| 40 | 33 | 35 | ar |
| 41 | 5  | 33 | 1  |
| 42 | 8  | 39 | 1  |
| 43 | 36 | 40 | 1  |
| 44 | 35 | 41 | 1  |
| 45 | 37 | 42 | 1  |
| 46 | 38 | 43 | 1  |
| 47 | 44 | 47 | ar |
| 48 | 47 | 48 | ar |
| 49 | 45 | 48 | ar |
| 50 | 45 | 49 | ar |
| 51 | 46 | 49 | ar |
| 52 | 44 | 46 | ar |
| 53 | 34 | 44 | 1  |
| 54 | 47 | 50 | 1  |
| 55 | 48 | 51 | 1  |
| 56 | 49 | 52 | 1  |
| 57 | 46 | 53 | 1  |

DAIN 1h:

E = -1334.438854 hartrees

No imaginary frequencies

mol2 file

#

# File Created by: Spartan '18 Export

#

@<TRIPOS>MOLECULE

M0003

52 56

SMALL

NO\_CHARGES

@<TRIPOS>ATOM

|    |     |              |              |              |      |   |        |
|----|-----|--------------|--------------|--------------|------|---|--------|
| 1  | N1  | -0.361922012 | -0.174357111 | -0.007879950 | N.2  | 1 | noname |
| 2  | C2  | -1.214136559 | -1.267800567 | -0.204707058 | C.2  | 1 | noname |
| 3  | C3  | -0.374836609 | -2.496984302 | -0.321584680 | C.2  | 1 | noname |
| 4  | N4  | 0.930326433  | -1.999425467 | -0.225667619 | N.am | 1 | noname |
| 5  | C5  | 0.849842908  | -0.626918415 | -0.018301231 | C.2  | 1 | noname |
| 6  | O6  | -0.642559947 | -3.672307937 | -0.467127393 | O.2  | 1 | noname |
| 7  | C7  | -2.562366444 | -1.170509840 | -0.345769647 | C.2  | 1 | noname |
| 8  | C8  | 2.060506390  | -2.899130989 | -0.139969082 | C.3  | 1 | noname |
| 9  | C9  | -3.245121652 | 0.145057710  | -0.395135373 | C.ar | 1 | noname |
| 10 | C10 | -4.600820476 | 2.597994801  | -0.475598837 | C.ar | 1 | noname |
| 11 | C11 | -2.694285804 | 1.244758664  | -1.064406692 | C.ar | 1 | noname |
| 12 | C12 | -4.493667814 | 0.297165891  | 0.222006210  | C.ar | 1 | noname |
| 13 | C13 | -5.159225155 | 1.514280453  | 0.193008586  | C.ar | 1 | noname |
| 14 | C14 | -3.370178108 | 2.455892506  | -1.107657813 | C.ar | 1 | noname |
| 15 | C15 | -3.431561438 | -2.370358422 | -0.444691894 | C.ar | 1 | noname |
| 16 | C16 | -5.135817877 | -4.580824682 | -0.634804685 | C.ar | 1 | noname |
| 17 | C17 | -4.374343666 | -2.458052956 | -1.474566531 | C.ar | 1 | noname |
| 18 | C18 | -3.367290737 | -3.400046411 | 0.496002534  | C.ar | 1 | noname |
| 19 | C19 | -4.216896124 | -4.493452687 | 0.405085508  | C.ar | 1 | noname |
| 20 | C20 | -5.210563525 | -3.561002895 | -1.577142167 | C.ar | 1 | noname |
| 21 | H21 | -5.926224222 | -3.620531318 | -2.391206935 | H    | 1 | noname |
| 22 | H22 | -4.443050016 | -1.655997736 | -2.202546767 | H    | 1 | noname |

|    |     |              |              |              |      |   |        |
|----|-----|--------------|--------------|--------------|------|---|--------|
| 23 | H23 | -4.157030975 | -5.282879739 | 1.147642727  | H    | 1 | noname |
| 24 | H24 | -2.649144927 | -3.337646321 | 1.305317201  | H    | 1 | noname |
| 25 | H25 | -4.937680302 | -0.546884070 | 0.738557739  | H    | 1 | noname |
| 26 | H26 | -6.119331845 | 1.613969152  | 0.689700118  | H    | 1 | noname |
| 27 | H27 | -5.124691786 | 3.548479216  | -0.507989983 | H    | 1 | noname |
| 28 | H28 | -2.931676767 | 3.294421031  | -1.639854783 | H    | 1 | noname |
| 29 | H29 | -1.732721483 | 1.143043593  | -1.549723527 | H    | 1 | noname |
| 30 | H30 | 1.652168518  | -3.893846838 | 0.045681088  | H    | 1 | noname |
| 31 | H31 | 2.724957274  | -2.612732652 | 0.677518575  | H    | 1 | noname |
| 32 | H32 | -5.795574997 | -5.439950361 | -0.708245466 | H    | 1 | noname |
| 33 | C33 | 2.010128429  | 0.254535719  | 0.187763789  | C.ar | 1 | noname |
| 34 | C34 | 4.130917993  | 2.057873385  | 0.598709053  | C.ar | 1 | noname |
| 35 | C35 | 3.269369605  | 0.008520982  | -0.362716012 | C.ar | 1 | noname |
| 36 | C36 | 1.819557065  | 1.421794004  | 0.934175626  | C.ar | 1 | noname |
| 37 | C37 | 2.864258765  | 2.305158812  | 1.139828422  | C.ar | 1 | noname |
| 38 | C38 | 4.312810863  | 0.900071590  | -0.160295135 | C.ar | 1 | noname |
| 39 | H39 | 2.628324806  | -2.932270676 | -1.074578125 | H    | 1 | noname |
| 40 | H40 | 0.837522362  | 1.615737525  | 1.349520180  | H    | 1 | noname |
| 41 | H41 | 3.437117430  | -0.862682298 | -0.983902740 | H    | 1 | noname |
| 42 | H42 | 2.702802497  | 3.189104119  | 1.748812522  | H    | 1 | noname |
| 43 | H43 | 5.274841520  | 0.706427273  | -0.624045603 | H    | 1 | noname |
| 44 | C44 | 5.247707642  | 3.000310438  | 0.818719523  | C.ar | 1 | noname |
| 45 | C45 | 7.271732422  | 4.706129390  | 1.213192083  | C.ar | 1 | noname |
| 46 | C46 | 5.073650688  | 4.384911937  | 0.814011651  | C.ar | 1 | noname |
| 47 | C47 | 6.556361176  | 2.572462201  | 1.045605256  | C.ar | 1 | noname |
| 48 | N48 | 7.570643365  | 3.409863596  | 1.238641751  | N.ar | 1 | noname |
| 49 | N49 | 6.070443244  | 5.241841686  | 1.012595502  | N.ar | 1 | noname |
| 50 | H50 | 6.789940442  | 1.510319047  | 1.089095905  | H    | 1 | noname |
| 51 | H51 | 8.093947114  | 5.399106657  | 1.372942990  | H    | 1 | noname |
| 52 | H52 | 4.092842317  | 4.817363309  | 0.625981189  | H    | 1 | noname |

@<TRIPOS>BOND

|    |    |    |    |
|----|----|----|----|
| 1  | 1  | 2  | 1  |
| 2  | 1  | 5  | 2  |
| 3  | 2  | 3  | 1  |
| 4  | 3  | 4  | am |
| 5  | 4  | 5  | 1  |
| 6  | 3  | 6  | 2  |
| 7  | 2  | 7  | 2  |
| 8  | 4  | 8  | 1  |
| 9  | 9  | 12 | ar |
| 10 | 12 | 13 | ar |
| 11 | 10 | 13 | ar |
| 12 | 10 | 14 | ar |
| 13 | 11 | 14 | ar |
| 14 | 9  | 11 | ar |
| 15 | 7  | 9  | 1  |
| 16 | 15 | 18 | ar |
| 17 | 18 | 19 | ar |
| 18 | 16 | 19 | ar |
| 19 | 16 | 20 | ar |
| 20 | 17 | 20 | ar |
| 21 | 15 | 17 | ar |
| 22 | 7  | 15 | 1  |
| 23 | 20 | 21 | 1  |
| 24 | 17 | 22 | 1  |
| 25 | 19 | 23 | 1  |
| 26 | 18 | 24 | 1  |
| 27 | 12 | 25 | 1  |
| 28 | 13 | 26 | 1  |
| 29 | 10 | 27 | 1  |
| 30 | 14 | 28 | 1  |
| 31 | 11 | 29 | 1  |
| 32 | 8  | 30 | 1  |
| 33 | 8  | 31 | 1  |
| 34 | 16 | 32 | 1  |
| 35 | 33 | 36 | ar |
| 36 | 36 | 37 | ar |
| 37 | 34 | 37 | ar |
| 38 | 34 | 38 | ar |
| 39 | 35 | 38 | ar |
| 40 | 33 | 35 | ar |
| 41 | 5  | 33 | 1  |
| 42 | 8  | 39 | 1  |

|    |    |    |    |
|----|----|----|----|
| 43 | 36 | 40 | 1  |
| 44 | 35 | 41 | 1  |
| 45 | 37 | 42 | 1  |
| 46 | 38 | 43 | 1  |
| 47 | 44 | 47 | ar |
| 48 | 47 | 48 | ar |
| 49 | 45 | 48 | ar |
| 50 | 45 | 49 | ar |
| 51 | 46 | 49 | ar |
| 52 | 44 | 46 | ar |
| 53 | 34 | 44 | 1  |
| 54 | 47 | 50 | 1  |
| 55 | 45 | 51 | 1  |
| 56 | 46 | 52 | 1  |

DAIN 2-H:

E = -1071.436857 hartrees

No imaginary frequencies

mol2 file

#

# File Created by: Spartan '18 Export

#

@<TRIPOS>MOLECULE

M0004

44 47

SMALL

NO\_CHARGES

@<TRIPOS>ATOM

|    |     |              |              |              |      |   |        |
|----|-----|--------------|--------------|--------------|------|---|--------|
| 1  | N1  | 0.809394033  | 0.576276037  | 0.170592290  | N.2  | 1 | noname |
| 2  | C2  | -0.028522351 | -0.528565605 | -0.024859553 | C.2  | 1 | noname |
| 3  | C3  | 0.827164255  | -1.748532846 | -0.126667746 | C.2  | 1 | noname |
| 4  | N4  | 2.124206923  | -1.235401211 | -0.023397940 | N.am | 1 | noname |
| 5  | C5  | 2.026330348  | 0.138474087  | 0.173159982  | C.2  | 1 | noname |
| 6  | O6  | 0.573406590  | -2.928123187 | -0.265203427 | O.2  | 1 | noname |
| 7  | C7  | -1.377080335 | -0.450188917 | -0.168406537 | C.2  | 1 | noname |
| 8  | C8  | 3.264978226  | -2.119201491 | 0.083226838  | C.3  | 1 | noname |
| 9  | C9  | -2.079026175 | 0.855493487  | -0.219519777 | C.ar | 1 | noname |
| 10 | C10 | -3.470999911 | 3.289113823  | -0.299208789 | C.ar | 1 | noname |
| 11 | C11 | -1.539946901 | 1.966585375  | -0.879716817 | C.ar | 1 | noname |
| 12 | C12 | -3.333762434 | 0.986762024  | 0.389350161  | C.ar | 1 | noname |
| 13 | C13 | -4.017480138 | 2.194215258  | 0.360802618  | C.ar | 1 | noname |
| 14 | C14 | -2.233915718 | 3.167794068  | -0.922682129 | C.ar | 1 | noname |
| 15 | C15 | -2.231215188 | -1.661900027 | -0.268272844 | C.ar | 1 | noname |
| 16 | C16 | -3.912919046 | -3.890312935 | -0.456221453 | C.ar | 1 | noname |
| 17 | C17 | -3.165788135 | -1.765389785 | -1.303938033 | C.ar | 1 | noname |
| 18 | C18 | -2.163239511 | -2.685472276 | 0.678859818  | C.ar | 1 | noname |
| 19 | C19 | -3.001514757 | -3.787851482 | 0.588775439  | C.ar | 1 | noname |
| 20 | C20 | -3.990808210 | -2.876981747 | -1.405416884 | C.ar | 1 | noname |
| 21 | H21 | -4.700271686 | -2.948426807 | -2.224018024 | H    | 1 | noname |
| 22 | H22 | -3.237604508 | -0.967931896 | -2.036687087 | H    | 1 | noname |
| 23 | H23 | -2.938969771 | -4.572201701 | 1.336537042  | H    | 1 | noname |
| 24 | H24 | -1.450052442 | -2.612279653 | 1.491622983  | H    | 1 | noname |
| 25 | H25 | -3.768838620 | 0.133755976  | 0.898730675  | H    | 1 | noname |
| 26 | H26 | -4.982190077 | 2.277529348  | 0.851756311  | H    | 1 | noname |
| 27 | H27 | -4.008588417 | 4.231930932  | -0.331064104 | H    | 1 | noname |
| 28 | H28 | -1.804011882 | 4.015121615  | -1.448030044 | H    | 1 | noname |
| 29 | H29 | -0.572411384 | 1.881793329  | -1.355990583 | H    | 1 | noname |
| 30 | H30 | 2.869980212  | -3.114330322 | 0.294162325  | H    | 1 | noname |
| 31 | H31 | 3.926626362  | -1.802618229 | 0.891615982  | H    | 1 | noname |
| 32 | H32 | -4.564130629 | -4.756070649 | -0.528528704 | H    | 1 | noname |
| 33 | C33 | 3.178272268  | 1.029549403  | 0.388859698  | C.ar | 1 | noname |
| 34 | C34 | 5.269239059  | 2.831217417  | 0.818766444  | C.ar | 1 | noname |
| 35 | C35 | 4.436063948  | 0.799086845  | -0.172732454 | C.ar | 1 | noname |
| 36 | C36 | 2.975331459  | 2.181578473  | 1.155967425  | C.ar | 1 | noname |
| 37 | C37 | 4.014928653  | 3.072698332  | 1.371946547  | C.ar | 1 | noname |
| 38 | C38 | 5.474466565  | 1.697449368  | 0.042058924  | C.ar | 1 | noname |
| 39 | H39 | 3.832563485  | -2.167829919 | -0.850862730 | H    | 1 | noname |
| 40 | H40 | 1.989388063  | 2.358963219  | 1.569901308  | H    | 1 | noname |
| 41 | H41 | 4.604756469  | -0.065759961 | -0.803118465 | H    | 1 | noname |
| 42 | H42 | 3.847121452  | 3.959658826  | 1.974690943  | H    | 1 | noname |
| 43 | H43 | 6.445608884  | 1.511578780  | -0.405693449 | H    | 1 | noname |
| 44 | H44 | 6.083460970  | 3.528744626  | 0.988853821  | H    | 1 | noname |

@<TRIPOS>BOND

|    |    |    |    |
|----|----|----|----|
| 1  | 1  | 2  | 1  |
| 2  | 1  | 5  | 2  |
| 3  | 2  | 3  | 1  |
| 4  | 3  | 4  | am |
| 5  | 4  | 5  | 1  |
| 6  | 3  | 6  | 2  |
| 7  | 2  | 7  | 2  |
| 8  | 4  | 8  | 1  |
| 9  | 9  | 12 | ar |
| 10 | 12 | 13 | ar |
| 11 | 10 | 13 | ar |
| 12 | 10 | 14 | ar |
| 13 | 11 | 14 | ar |
| 14 | 9  | 11 | ar |
| 15 | 7  | 9  | 1  |
| 16 | 15 | 18 | ar |
| 17 | 18 | 19 | ar |
| 18 | 16 | 19 | ar |
| 19 | 16 | 20 | ar |
| 20 | 17 | 20 | ar |
| 21 | 15 | 17 | ar |
| 22 | 7  | 15 | 1  |
| 23 | 20 | 21 | 1  |
| 24 | 17 | 22 | 1  |
| 25 | 19 | 23 | 1  |
| 26 | 18 | 24 | 1  |
| 27 | 12 | 25 | 1  |
| 28 | 13 | 26 | 1  |
| 29 | 10 | 27 | 1  |
| 30 | 14 | 28 | 1  |
| 31 | 11 | 29 | 1  |
| 32 | 8  | 30 | 1  |
| 33 | 8  | 31 | 1  |
| 34 | 16 | 32 | 1  |
| 35 | 33 | 36 | ar |
| 36 | 36 | 37 | ar |
| 37 | 34 | 37 | ar |
| 38 | 34 | 38 | ar |
| 39 | 35 | 38 | ar |
| 40 | 33 | 35 | ar |
| 41 | 5  | 33 | 1  |
| 42 | 8  | 39 | 1  |
| 43 | 36 | 40 | 1  |
| 44 | 35 | 41 | 1  |
| 45 | 37 | 42 | 1  |
| 46 | 38 | 43 | 1  |
| 47 | 34 | 44 | 1  |
